# Supplementary material for: Patient-related factors associated with superficial surgical site infection and progression to a periprosthetic joint infection after elective primary total joint arthroplasty: a single-centre, retrospective study in Sweden
Source: PubMed Central journal article supplement — BMJ Open. 2022 Sep 15;12(9):e060754. doi: 10.1136/bmjopen-2022-060754 (PMC9486361; doi:10.1136/bmjopen-2022-060754), 2022-09-15
Supplement: bmjopen-2022-060754.draft_revisions.pdf [file bmjopen-2022-060754.draft_revisions.pdf]

# BMJ Open

BMJ Open is committed to open peer review. As part of this commitment we make the peer review history of every article we publish publicly available.

When an article is published we post the peer reviewers' comments and the authors' responses online. We also post the versions of the paper that were used during peer review. These are the versions that the peer review comments apply to.

The versions of the paper that follow are the versions that were submitted during the peer review process. They are not the versions of record or the final published versions. They should not be cited or distributed as the published version of this manuscript.

BMJ Open is an open access journal and the full, final, typeset and author-corrected version of record of the manuscript is available on our site with no access controls, subscription charges or pay-per-view fees (<http://bmjopen.bmj.com>).

If you have any questions on BMJ Open's open peer review process please email [info.bmjopen@bmj.com](mailto:info.bmjopen@bmj.com)

# BMJ Open

**Which patient-related factors are linked to superficial surgical site infection and the progression into a periprosthetic joint infection after elective primary total joint arthroplasty?  
A cross-sectional study on 1,291 patients**

|                               |                                                                                                                                                                                                                                             |
|-------------------------------|---------------------------------------------------------------------------------------------------------------------------------------------------------------------------------------------------------------------------------------------|
| Journal:                      | <i>BMJ Open</i>                                                                                                                                                                                                                             |
| Manuscript ID                 | bmjopen-2022-060754                                                                                                                                                                                                                         |
| Article Type:                 | Original research                                                                                                                                                                                                                           |
| Date Submitted by the Author: | 08-Jan-2022                                                                                                                                                                                                                                 |
| Complete List of Authors:     | Eriksson, Hannah; Uppsala University Department of Surgical Sciences, Department of Surgical Sciences/Orthopaedics<br>Lazarinis, Stergios; Uppsala University Department of Surgical Sciences, Department of Surgical Sciences/Orthopaedics |
| Keywords:                     | Musculoskeletal disorders < ORTHOPAEDIC & TRAUMA SURGERY, Adult orthopaedics < ORTHOPAEDIC & TRAUMA SURGERY, Hip < ORTHOPAEDIC & TRAUMA SURGERY, Knee < ORTHOPAEDIC & TRAUMA SURGERY                                                        |
|                               |                                                                                                                                                                                                                                             |

SCHOLARONE™  
Manuscripts

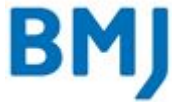

I, the Submitting Author has the right to grant and does grant on behalf of all authors of the Work (as defined in the below author licence), an exclusive licence and/or a non-exclusive licence for contributions from authors who are: i) UK Crown employees; ii) where BMJ has agreed a CC-BY licence shall apply, and/or iii) in accordance with the terms applicable for US Federal Government officers or employees acting as part of their official duties; on a worldwide, perpetual, irrevocable, royalty-free basis to BMJ Publishing Group Ltd ("BMJ") its licensees and where the relevant Journal is co-owned by BMJ to the co-owners of the Journal, to publish the Work in this journal and any other BMJ products and to exploit all rights, as set out in our [licence](#).

The Submitting Author accepts and understands that any supply made under these terms is made by BMJ to the Submitting Author unless you are acting as an employee on behalf of your employer or a postgraduate student of an affiliated institution which is paying any applicable article publishing charge ("APC") for Open Access articles. Where the Submitting Author wishes to make the Work available on an Open Access basis (and intends to pay the relevant APC), the terms of reuse of such Open Access shall be governed by a Creative Commons licence – details of these licences and which [Creative Commons](#) licence will apply to this Work are set out in our licence referred to above.

Other than as permitted in any relevant BMJ Author's Self Archiving Policies, I confirm this Work has not been accepted for publication elsewhere, is not being considered for publication elsewhere and does not duplicate material already published. I confirm all authors consent to publication of this Work and authorise the granting of this licence.

1  
2  
3 1 Which patient-related factors are linked to superficial surgical site  
4  
5 2 infection and the progression into a periprosthetic joint infection after  
6  
7 3 elective primary total joint arthroplasty?  
8  
9  
10 4 A cross-sectional study on 1,291 patients  
11  
12 5

13  
14 6 Running title: Which patient-related factors are linked to superficial surgical site infection and the  
15  
16 7 progression in to a periprosthetic joint infection?  
17  
18 8

19 9 Hannah K Eriksson MD, hannah.eriksson@surgsci.uu.se

20  
21 10 Stergios Lazarinis MD, PhD, lazarinis.stergios@surgsci.uu.se

22  
23 11 Department of Surgical Sciences/Orthopaedics, Uppsala University Hospital, Uppsala,  
24  
25 12 Sweden.  
26  
27 13

28 14 **Declarations**

29  
30 15 None of the authors have any conflict of interest to declare.

31 16 *Ethics approval*

32  
33 17 The study design was reviewed and approved by the Human Research Ethics Committee in  
34  
35 18 Uppsala, Sweden, Nr: 2019-01425.  
36  
37 19

38 20 First author:

39  
40 21 H.K Eriksson

41  
42 22 Department of Surgical Sciences/Orthopaedics

43  
44 23 Uppsala University Hospital

45  
46 24 SE-751 85 Uppsala, Sweden

47 25 Email: [hannah.eriksson@surgsci.uu.se](mailto:hannah.eriksson@surgsci.uu.se)  
48  
49 26  
50  
51  
52  
53  
54  
55  
56  
57  
58  
59  
60

1  
2  
3 27 **Abstract**

4 28

5  
6 29 **Objectives:** The incidence of superficial surgical site infection (SSSI) may increase the risk of  
7  
8  
9 30 periprosthetic joint infection (PJI). The objective of this study is to identify patient-related risk factors  
10  
11 31 associated with SSSI and investigate their correlation with the progression of PJI. **Design:** 1,291  
12  
13 32 primary elective hip and knee prostheses were included. Patients were interviewed  $\geq 3$  months after  
14  
15  
16 33 surgery to answer questions about the postoperative period, including any occurrences of SSSI. The  
17  
18 34 diagnosed PJI was determined by an orthopaedic surgeon and a specialist in infectious diseases. All  
19  
20 35 patients with PJI underwent revision surgery. **Setting:** This study was performed at Uppsala University  
21  
22  
23 36 Hospital, Uppsala.

24  
25 37 **Participants:** 1,184 patients and 1,314 joints were included. Because of bilateral surgery during the  
26  
27 38 same operative session, 23 joints were excluded due to an increased risk of infection.

28  
29 39 **Primary and secondary outcome measures:** Which of the patient-related risk factors; joint, age,  
30  
31 40 sex, the American Society of Anaesthesiologists classification (ASA), body mass index (BMI),  
32  
33 41 smoking, diabetes and rheumatic disease associated with 1) superficial surgical site infection and 2)  
34  
35 42 the progress in to a periprosthetic joint infection.

36  
37 43 **Results:** 7.0% of the patients developed an SSSI and 26.7% of those progressed to a PJI. Factors  
38  
39 44 found with increased adjusted risk ratio (aRR) for SSSI were: knee surgery (1.9; 95% confidence  
40  
41 45 interval CI: 1.2 – 3.1), age  $\geq 65$  years (1.7; 95% CI: 1.1 – 2.8) and BMI  $\geq 35$  (2.3; 95% CI: 1.2 – 4.2).  
42  
43 46 Male patients showed a significant risk of developing PJI after SSSI, with a RR of 3.3 (95% CI: 1.1  
44  
45 47 – 10.5).

46  
47 48 **Conclusions:** Patients developing SSSI have a great risk on progress to PJI. Older obese patients  
48  
49 49 considered for elective primary total knee arthroplasty seem to have an increased risk of developing  
50  
51 50 SSSI and male gender is the most significant risk factor to progress from SSSI into PJI.  
52  
53  
54  
55  
56

57 51  
58  
59  
60

## 52 **Strengths and limitations of this study**

### 53 Strengths

- 54 - Large cohort size (n=1291)
- 55 - Meticulous follow-up of each patient
- 56 - Exclusively includes patients with primary elective joint surgery

### 57 Limitations

- 58 - Retrospective study design
- 59 - Small number of infections leading to the risk of a type II error.

60

## 61 **Keywords**

62 Periprosthetic joint infection (PJI), superficial surgical site infection (SSSI), total joint arthroplasty,  
63 risk factors.

## 64 **Introduction**

65 Infection after TJA can be defined as either superficial involving skin or subcutaneous tissue only (a  
66 superficial surgical site infection, SSSI) or deep (periprosthetic joint infection, PJI) with deep soft  
67 tissue involvement (e.g., fascial and muscle layers) and the prosthesis. The incidence of SSSI after  
68 TJA can vary from 1 to 10% (1, 2) and may increase the risk of PJI by up to 35 times (3). The  
69 frequency of PJI ranges between 1 and 5% (4-7). Patient-related risk factors, such as obesity, RA,  
70 smoking, male sex, age, alcohol abuse, American Society of Anaesthesiologists (ASA) classification  
71 >2 and diabetes mellitus (DM) (8-16), have been described as risk factors for PJI. In clinical practice  
72 priority should be to identify patients at high risk for SSSI and PJI, aiming for patient optimisation  
73 and the opportunity to manage modifiable risk factors since it is essential to seize any opportunity to  
74 optimise all prerequisites for the best achievable surgical outcome. Our primary objectives were to  
75 1) determine which patient-related factors are linked to superficial surgical site infection (SSSI) and  
76 2) investigate the progression in to a deep periprosthetic joint infection (PJI). Our study aims to (i)  
77 identify patient-related risk factors associated with SSSI and (ii) investigate their correlation with the  
78 progression of PJI.

79

80

1  
2  
3  
4  
5  
6  
7  
8  
9  
10  
11  
12  
13  
14  
15  
16  
17  
18  
19  
20  
21  
22  
23  
24  
25  
26  
27  
28  
29  
30  
31  
32  
33  
34  
35  
36  
37  
38  
39  
40  
41  
42  
43  
44  
45  
46  
47  
48  
49  
50  
51  
52  
53  
54  
55  
56  
57  
58  
59  
60

## 80 **Methods**

### 81 *Study design*

82 This cross-sectional study of primary elective prostheses in hip or knee joints included patients in a  
83 national project designed to lower the incidence of hospital-related infections (17). Patients included  
84 in this study were treated at Uppsala University hospital from November 2008 to December 2012, and  
85 interviewed  $\geq 3$  months after surgery to answer questions about the postoperative period. The patients'  
86 records were reviewed to determine whether there had been any documentation of difficulties with  
87 wound-healing or whether antibiotics were prescribed to treat an infection related to arthroplasty  
88 surgery.

89 In a retrospective review of patient records selected patients fulfilled the criteria for PJI (18), but  
90 those criteria had not been used at diagnosis. Patient records were reviewed for patient-related risk  
91 factors while a local arthroplasty register was used to obtain perioperative information about whether  
92 revision surgery had been necessary due to persistent PJI. Follow-up was a minimum of 5 years.

93 This study was limited to patient-related risk factors associated with developing an SSSI and focused  
94 on those factors that might be possible to avoid or optimise preoperatively.

95 Consent for publication was considered in the application to the Human Research Ethics

96 Committee. However, no consent, verbal or written was needed, due to the retrospective study

97 design. The study design was reviewed and approved by the Human Research Ethics Committee

98 (Dnr: 2019-01425).

### 99 *Patient and Public Involvement*

100 Patients or the public were not involved in the development of the research question, outcome

101 measures, the design, conduct, reporting, or dissemination plans of our research. The results of this

102 study will not be separately disseminated to study participants.

103

104

105

1  
2 106 *Study population*

3  
4  
5 107 1,184 patients and 1,314 joints were included. Because of bilateral surgery during the same operative  
6  
7 108 session, 23 joints were excluded due to an increased risk of infection. 1,291 surgeries (815 hips, 476  
8  
9 109 knees) were included.

10  
11  
12 110 Only cemented components were used in all knees. Hip prostheses were cemented, cementless or  
13  
14 111 hybrids. In all cemented prostheses antibiotic-loaded cement with gentamycin was applied. All  
15  
16 112 patients received systemic pre- and perioperative antibiotic prophylaxis in accordance with national  
17  
18 113 guidelines (cloxacillin, and in the case of penicillin allergy, clindamycin).

19  
20  
21 114 *Statistics*

22  
23 115 Descriptive statistics were used to summarise and report demographic characteristics.

24  
25 116 *Confounders*

26  
27  
28 117 Such patient-related factors as joint, sex, age, BMI, RA, ASA classification, smoking and DM were  
29  
30 118 considered clinically relevant confounders in the correlation between arthroplasty surgery and SSSI  
31  
32 119 or PJI.

33  
34  
35 120 These specific patient-related variables have previously been linked to exposure and outcome and are  
36  
37 121 not considered in the causal pathway between potential risk factors and outcome (Figure 1).

38  
39 122 Some of the relevant confounders were analysed as categorical variables: ASA classification: <3 or  
40  
41 123  $\geq 3$ , BMI: <35 or  $\geq 35$  and Age: <65 years or  $\geq 65$  years.

42  
43  
44 124 Patients with DM included both type 1 and 2 (drug- or diet-treated). In an initial analysis logistic  
45  
46 125 regression was performed, entering all covariates as singular variables. Crude risk ratios (RRs) for  
47  
48 126 SSSI and PJI were calculated for each variable with 95% confidence intervals (95% CIs). In the next  
49  
50  
51 127 step the covariates were entered in the regression model, with RRs mutually adjusted for all  
52  
53 128 covariates. Adjusted RRs (aRRs) for each covariate were calculated for the occurrence of SSSI or PJI  
54  
55 129 and any progression of SSSI in to PJI.

56  
57  
58 130 All statistical analyses were performed using SPSS (version 26.0) and p-values  $\leq 0.05$  were  
59  
60 131 considered statistically significant.



1  
2  
3  
4  
5  
6  
7  
8  
9  
10  
11  
12  
13  
14  
15  
16  
17  
18  
19  
20  
21  
22  
23  
24  
25  
26  
27  
28  
29  
30  
31  
32  
33  
34  
35  
36  
37  
38  
39  
40  
41  
42  
43  
44  
45  
46  
47  
48  
49  
50  
51  
52  
53  
54  
55  
56  
57  
58  
59  
60**Results**

The total number of surgeries for prosthetic hip or knee joints was 1,291. 90 knee joints (7.0%) developed an SSSI and 24 (1.9%) a PJI. Of the 90 joints with SSSI, 24 (26.7%) progressed to a PJI (Figure 2).

In the hip cohort (815) 41 joints (5.0%) developed an SSSI, and 9 (1.1%) a PJI. In the knee cohort (476), 49 joints ((10.0%) developed an SSSI and 15 (3.2%) a PJI (Table 1).

**Table 1. Number of postoperative infections**

| Variable                   | SSSI        | PJI       |
|----------------------------|-------------|-----------|
| <b>Total cohort (1291)</b> | 90 (7.0 %)  | 24 (1.9%) |
| <b>Hip (815)</b>           | 41 (5.0 %)  | 9 (1.1%)  |
| <b>Knee (476)</b>          | 49 (10.3 %) | 15 (3.2%) |

SSSI (superficial surgical site infection), PJI (periprosthetic joint infection).

142 Demographic characteristics of the cohorts are outlined in Table 2.

**Table 2. Demographic characteristics**

| Variable                                   | Total cohort<br>n = 1291 | Hip cohort<br>n = 815 (63%) | Knee cohort<br>n = 476 (37%) | Range |
|--------------------------------------------|--------------------------|-----------------------------|------------------------------|-------|
| <b>Mean age (year)</b>                     | 63                       | 61                          | 65                           | 18–96 |
| <b>Age</b>                                 |                          |                             |                              |       |
| <65                                        | 729 (56%)                | 479 (59%)                   | 250 (53%)                    |       |
| ≥65                                        | 562 (44%)                | 336 (41%)                   | 226 (47%)                    |       |
| <b>ASA-class<sup>a</sup></b>               |                          |                             |                              |       |
| ≤2                                         | 1048 (82%)               | 679 (85%)                   | 369 (79%)                    |       |
| ≥3                                         | 225 (18%)                | 125 (15%)                   | 100 (21%)                    |       |
| <b>Mean Body mass index</b>                | 28                       | 27                          | 29                           | 14–51 |
| <b>BMI<sup>b</sup></b>                     |                          |                             |                              |       |
| <35                                        | 1145 (90%)               | 743 (92%)                   | 402 (86%)                    |       |
| ≥35                                        | 130 (10%)                | 63 (8%)                     | 67 (14%)                     |       |
| <b>Gender</b>                              |                          |                             |                              |       |
| Woman                                      | 731 (57%)                | 421 (52%)                   | 310 (65%)                    |       |
| Man                                        | 560 (43%)                | 394 (48%)                   | 166 (35%)                    |       |
| <b>Smoking<sup>c</sup></b>                 |                          |                             |                              |       |
| No                                         | 1141 (90%)               | 716 (90%)                   | 425 (90%)                    |       |
| Yes                                        | 129 (10%)                | 84 (10%)                    | 45 (10%)                     |       |
| <b>Diabetes<sup>a</sup></b>                |                          |                             |                              |       |
| No                                         | 1145 (90%)               | 731 (91%)                   | 414 (88%)                    |       |
| Yes                                        | 128 (10%)                | 73 (9%)                     | 55 (12%)                     |       |
| <b>Rheumatological disease<sup>d</sup></b> |                          |                             |                              |       |
| No                                         | 1052 (88%)               | 689 (91%)                   | 363 (83%)                    |       |
| Yes                                        | 139 (12%)                | 67 (9%)                     | 72 (17%)                     |       |

ASA (American Society of Anaesthesiologists), BMI (Body mass index).

<sup>a</sup> missing data in 18 cases

<sup>b</sup> missing data in 16 cases

<sup>c</sup> missing data in 21 cases

<sup>d</sup> missing data in 100 cases

1

2 150 *Risk factors for SSSI*

3  
4  
5 151 Risk factors with a significant crude RR for developing SSSI were knee surgery (2.2; 95% CI: 1.4 –  
6  
7 152 3.3), age  $\geq 65$  years (1.7; 95% CI: 1.1 – 2.6), ASA classification  $\geq 3$  (2.3; 95% CI: 1.4 – 3.7), BMI  $\geq 35$   
8  
9 153 (2.4; 95% CI: 1.4 – 4.2) and rheumatic disease (1.9; 95% CI: 1.1 – 3.4). Adjusting for all covariates,  
10  
11 154 factors with significant aRRs for SSSI were knee surgery (1.9; 95% CI 1.2 – 3.1), age  $\geq 65$  years (1.7;  
12  
13 95% CI: 1.1 – 2.8) and BMI  $\geq 35$  (2.3; 95% CI: 1.2 – 4.2) (Table 3).  
14 155

16 **Table 3. Risk ratio (RR) for SSSI**

| Variable                                   | SSSI     | Crude RR<br>(95 % CI) | P-value      | Adjusted RR<br>(95 % CI) | P-value      |
|--------------------------------------------|----------|-----------------------|--------------|--------------------------|--------------|
| <b>No SSSI</b> 1201 (93%)                  |          |                       |              |                          |              |
| <b>SSSI</b> 90 (7%)                        |          |                       |              |                          |              |
| <b>Joint</b>                               |          |                       |              |                          |              |
| Hip                                        | 41 (45%) |                       |              |                          |              |
| Knee                                       | 49 (55%) | 2,2 (1,4 – 3,3)       | <b>0,000</b> | 1,9 (1,2 – 3,1)          | <b>0,005</b> |
| <b>Age</b>                                 |          |                       |              |                          |              |
| <65                                        | 40 (44%) |                       |              |                          |              |
| $\geq 65$                                  | 50 (56%) | 1,7 (1,1 – 2,6)       | <b>0,018</b> | 1,7 (1,1 – 2,8)          | <b>0,024</b> |
| <b>ASA class<sup>a</sup></b>               |          |                       |              |                          |              |
| $\leq 2$                                   | 61 (69%) |                       |              |                          |              |
| $\geq 3$                                   | 28 (31%) | 2,3 (1,4 – 3,7)       | <b>0,001</b> | 1,6 (0,9 – 2,7)          | 0,069        |
| <b>Body mass index</b>                     |          |                       |              |                          |              |
| <35                                        | 72 (80%) |                       |              |                          |              |
| $\geq 35$                                  | 18 (20%) | 2,4 (1,4 – 4,2)       | <b>0,002</b> | 2,3 (1,2 – 4,2)          | <b>0,010</b> |
| <b>Gender</b>                              |          |                       |              |                          |              |
| Woman                                      | 49 (54%) |                       |              |                          |              |
| Men                                        | 41 (46%) | 1,1 (0,7 – 1,7)       | 0,666        | 1,4 (0,9 – 2,2)          | 0,206        |
| <b>Smoking<sup>a</sup></b>                 |          |                       |              |                          |              |
| No                                         | 80 (90%) |                       |              |                          |              |
| Yes                                        | 9 (10%)  | 1,0 (0,5 – 2,0)       | 0,988        | 1,1 (0,5 – 2,4)          | 0,836        |
| <b>Diabetes<sup>a</sup></b>                |          |                       |              |                          |              |
| No                                         | 76 (85%) |                       |              |                          |              |
| Yes                                        | 13 (15%) | 1,6 (0,9 – 3,0)       | 0,142        | 1,2 (0,6 – 2,3)          | 0,606        |
| <b>Rheumatological disease<sup>b</sup></b> |          |                       |              |                          |              |
| No                                         | 68 (81%) |                       |              |                          |              |
| Yes                                        | 16 (19%) | 1,9 (1,1 – 3,4)       | <b>0,031</b> | 1,7 (0,9 – 3,2)          | 0,077        |

156 SSSI (superficial surgical site infection), ASA (American Society of Anaesthesiologists), CI (confidence interval)

157 <sup>a</sup> missing data in 1 case

158 <sup>b</sup> missing data in 6 cases

159

160 *Risk factors for PJI*

161 Risk factors with a significant crude RR for the development of PJI were knee surgery, ASA  
162 classification  $\geq 3$  and BMI  $\geq 35$ . Factors with significant aRRs for PJI were knee surgery (2.6; 95%  
CI: 1.4 – 4.2) and BMI  $\geq 35$  (2.3; 95% CI: 1.2 – 4.2) (Table 3).

60

1  
2  
3 163 CI: 1.1 – 6.4), ASA classification  $\geq 3$  (3.2; 95% CI: 1.3 – 7.9), BMI  $\geq 35$  (3.0; 95% CI: 1.2 – 4.2) and  
4  
5 164 male sex (3.0; 95% CI: 1.2 – 7.5) (Table 4).

6  
7 **Table 4. Risk ratio (RR) for PJI**

| Variable                       | PJI          | Crude RR<br>(95 % CI) | P-value      | Adjusted RR<br>(95 % CI) | P-value      |
|--------------------------------|--------------|-----------------------|--------------|--------------------------|--------------|
| <b>No PJI</b>                  | 1267 (98,1%) |                       |              |                          |              |
| <b>PJI</b>                     | 24 (1,9%)    |                       |              |                          |              |
| <b>Joint</b>                   |              |                       |              |                          |              |
| Hip                            | 9 (38%)      |                       |              |                          |              |
| Knee                           | 15 (63%)     | 2,9 (1,3 – 6,7)       | <b>0,012</b> | 2,6 (1,1 – 6,4)          | <b>0,033</b> |
| <b>Age</b>                     |              |                       |              |                          |              |
| <65                            | 12 (50%)     |                       |              |                          |              |
| $\geq 65$                      | 12 (50%)     | 1,3 (0,6 – 2,9)       | 0,520        | 1,0 (0,4 – 2,5)          | 0,941        |
| <b>ASA class</b>               |              |                       |              |                          |              |
| $\leq 2$                       | 12 (50%)     |                       |              |                          |              |
| $\geq 3$                       | 12 (50%)     | 4,9 (2,2 – 11,0)      | <b>0,000</b> | 3,2 (1,3 – 7,9)          | <b>0,010</b> |
| <b>Body Mass Index</b>         |              |                       |              |                          |              |
| <35                            | 17 (71%)     |                       |              |                          |              |
| $\geq 35$                      | 7 (29%)      | 3,8 (1,5 – 9,3)       | <b>0,004</b> | 3,0 (1,2 – 4,2)          | <b>0,032</b> |
| <b>Gender</b>                  |              |                       |              |                          |              |
| Woman                          | 9 (38%)      |                       |              |                          |              |
| Men                            | 15 (62%)     | 2,2 (0,9 – 5,1)       | 0,063        | 3,0 (1,2 – 7,5)          | <b>0,016</b> |
| <b>Smoking</b>                 |              |                       |              |                          |              |
| No                             | 23 (96%)     |                       |              |                          |              |
| Yes                            | 1 (4%)       | 0,4 (0,1 – 2,8)       | 0,345        | 2,2 (0,3 – 16,8)         | 0,448        |
| <b>Diabetes</b>                |              |                       |              |                          |              |
| No                             | 19 (79%)     |                       |              |                          |              |
| Yes                            | 5 (21%)      | 2,4 (0,9 – 6,6)       | 0,086        | 1,4 (0,5 – 4,0)          | 0,544        |
| <b>Rheumatological disease</b> |              |                       |              |                          |              |
| No                             | 19 (79%)     |                       |              |                          |              |
| Yes                            | 5 (21%)      | 2,0 (0,7 – 5,5)       | 0,166        | 1,9 (0,6 – 5,5)          | 0,259        |

41 165 SSSI (superficial surgical site infection), PJI (periprosthetic joint infection), ASA (American Society of Anaesthesiologists)  
42 166 CI (confidence interval)

43 167

44  
45 168

169 *Risk factors for PJI in patients with SSSI*

170 In the group of patients with SSSI the only significant risk factor for progression to PJI was male sex,  
 171 with an aRR of 3.3 (95% CI: 1.1 – 10.5) (Table 5).

**Table 5. Risk ratio (RR) for PJI in patients with SSSI**

| Variable                       | PJI      | Crude RR<br>(95 % CI) | P-value      | Adjusted RR<br>(95 % CI) | P-value      |
|--------------------------------|----------|-----------------------|--------------|--------------------------|--------------|
| <b>SSSI - no PJI</b> 66 (73%)  |          |                       |              |                          |              |
| <b>SSSI - PJI</b> 24 (27%)     |          |                       |              |                          |              |
| <b>Joint</b>                   |          |                       |              |                          |              |
| Hip                            | 9 (37%)  |                       |              |                          |              |
| Knee                           | 15 (63%) | 1,6 (0,6 – 4,1)       | 0,357        | 1,5 (0,5 – 4,4)          | 0,462        |
| <b>Age</b>                     |          |                       |              |                          |              |
| <65                            | 12 (50%) |                       |              |                          |              |
| ≥65                            | 12 (50%) | 1,4 (0,5 – 3,5)       | 0,523        | 1,6 (0,6 – 4,9)          | 0,376        |
| <b>ASA-class</b>               |          |                       |              |                          |              |
| ≤2                             | 12 (50%) |                       |              |                          |              |
| ≥3                             | 12 (50%) | 3,0 (1,1 – 8,2)       | <b>0,025</b> | 3,1 (1,0 – 10,0)         | 0,051        |
| <b>Body Mass Index</b>         |          |                       |              |                          |              |
| <35                            | 17 (71%) |                       |              |                          |              |
| ≥35                            | 7 (29%)  | 2,1 (0,7 – 6,1)       | 0,195        | 2,0 (0,5 – 8,1)          | 0,316        |
| <b>Gender</b>                  |          |                       |              |                          |              |
| Woman                          | 9 (37%)  |                       |              |                          |              |
| Men                            | 15 (63%) | 2,6 (1,0 – 6,7)       | 0,055        | 3,3 (1,1 – 10,5)         | <b>0,041</b> |
| <b>Smoking</b>                 |          |                       |              |                          |              |
| No                             | 23 (96%) |                       |              |                          |              |
| Yes                            | 1 (4%)   | 3,2 (0,4 – 27,0)      | 0,282        | 0,3 (0,4 – 39,5)         | 0,230        |
| <b>Diabetes</b>                |          |                       |              |                          |              |
| No                             | 19 (79%) |                       |              |                          |              |
| Yes                            | 5 (21%)  | 1,9 (0,6 – 6,4)       | 0,317        | 1,6 (0,3 – 7,5)          | 0,556        |
| <b>Rheumatological disease</b> |          |                       |              |                          |              |
| No                             | 19 (79%) |                       |              |                          |              |
| Yes                            | 5 (21%)  | 0,9 (0,3 – 2,8)       | 0,792        | 1,2 (0,3 – 5,1)          | 0,780        |

SSSI (superficial surgical site infection), PJI (periprosthetic joint infection), ASA (American Society of Anaesthesiologists)  
 CI (confidence interval)

## Discussion

This study shows that knee surgery, age >65 years and obesity are independent risk factors for the development of SSSI. Superficial wound complications were associated with PJI in 24% of the cases, and male sex was a significant factor in the progression into PJI. A recent meta-analysis, showed that male sex was a risk factor for PJI development, especially after total knee arthroplasty (TKA) supports these results (19). The link between male sex and PJI may be attributed to some contributing behavioural factors, including smoking, diet, hygiene and alcohol consumption, but the reasons behind this are not clear. Sex-related differences in immune response due to bacteria (e.g., *Staphylococcus aureus* and *Pseudomonas aeruginosa*) have been reported. In addition, septicaemia and bacteraemia occur more frequently in males than females (20), but whether it will or will not this affect the development of SSSI or PJI has yet to be investigated.

Patients with knee prostheses have shown a higher rate of PJI and are known to be in greater need of revision surgery than patients with hip prostheses (6, 9, 12, 19). There is less soft tissue around the knee than around the hip, meaning a shorter distance between skin and joint. Blood circulation around the knee area is more exposed to impact than the hip area and the perfusion is easier to disturb.

Age was a significant risk factor for SSSI in our study, which is congruent with results from a large (n=1,000 patients) retrospective study (1). An elderly patient may have pre-existing medical conditions and fragile skin that can impair wound healing and cause SSSI.

A high ASA classification posed a significant risk factor for developing PJI and SSSI in the univariate analysis but not after adjusting for the other covariates. The correlation between a high ASA classification and infection after surgery may be explained because the ASA classification encapsulates several other known risk factors (e.g., smoking, DM and obesity). Each of these risk factors has been independently associated with a higher risk of surgical site infection resulting from tissue hypoperfusion and subsequent impaired immunological function (13, 21).

Excess weight/obesity is a known risk factor for osteoarthritis, TJA and PJI (22). Multiple medical comorbidities, including DM type II, hypertension and cardiovascular diseases, are usually associated

1  
2 202 with obesity, affecting patients' BMI and ASA classification (23-25). In this study BMI  $\geq$  35 was a  
3  
4  
5 203 risk factor for SSSI and PJI. The association between BMI and postoperative wound complications  
6  
7 204 may be explained by prolonged or more complicated arthroplasty surgery (26) and protracted  
8  
9 205 postoperative wound drainage (27). The present results are in line with large register-based studies.  
10  
11 206 Sayed-Noor et al. observed that the risk of reoperation within 2 to 5 years increased in patients with  
12  
13  
14 207 higher BMI classification (I-III) (28). In another study with 19,000 patients by Shohat et al. noted  
15  
16 208 that the BMI cut-off threshold was associated with an increased risk of PJI (29). No threshold for PJI  
17  
18 209 was observed (29), although a higher BMI classification was linked to an increased risk of PJI.  
19  
20  
21 210 The rate of SSSI (7.0%) and PJI (1.9%) in this study is consistent with international studies showing  
22  
23 211 levels of SSSI ranging from 1-10% (1, 30) and PJI ranging from 0.2-2.23% (5, 6, 8).  
24  
25 212 Two major strengths of this study are cohort size (n=1291) and the meticulous follow-up of each  
26  
27  
28 213 patient. This thorough postoperative follow-up confirms that the number of recorded incidents of  
29  
30 214 SSSI is accurate, and the follow-up time of 5 years is sufficient to reveal any potential cases of PJI.  
31  
32 215 Similar studies have presented larger cohorts but only on registers (31, 32) or shorter follow-ups (1,  
33  
34 216 2, 31). Our study exclusively includes patients with primary elective joint surgery to minimise the  
35  
36  
37 217 influence of other risk factors concatenated with the initial trauma (hip fractures) or extended impact  
38  
39 218 on the tissue (revision surgery). This inclusion criterion is an additional strength of the study given  
40  
41  
42 219 that the rate of PJI is known to be higher after trauma and revision surgery (33).  
43  
44 220 A potential limitation is the retrospective nature of the study design. Therefore, there may be  
45  
46 221 inaccuracies or misinterpretations of information received from medical records. Another limitation  
47  
48 222 is that SSSI is not culture-verified but determined by medical assessment, reflecting clinical reality.  
49  
50  
51 223 As in infection-related research in general in which a small number of infections is a major challenge,  
52  
53 224 this study may have failed to detect a link between a potential risk factor and postoperative infection  
54  
55 225 due to a type II error. A larger cohort would have been desirable.  
56  
57  
58  
59  
60

## 226 **Conclusion**

227 In conclusion, this study demonstrates that patients developing SSSI after primary elective hip or  
228 knee arthroplasty have a great risk to progress into PJI. Older ( $\geq 65$  years) obese patients seem to have  
229 an increased risk of developing SSSI. Male gender is a significant patient-related risk factor to  
230 progress from SSSI into PJI.

## 231 **Acknowledgement**

232 We thank Jakob Viklander for his valuable assistance during data compilation.

## 233 **Availability of data and materials**

234 The dataset generated and analysed during the current study are available from the corresponding  
235 author on reasonable request.

## 236 **Competing interests**

237 The authors declare that they have no competing interests in this work.

## 238 **Funding**

239 This research received no specific grant from any funding agency in the public, commercial or not-  
240 for-profit sectors.

## 241 **Authors' contributions**

242 Both authors (HE, SL) made substantial contributions to conception and design of the study  
243 and in acquisition, analysis and interpretation of data. Both authors (HE, SL) have been  
244 involved in drafting the manuscript and given final approval of the version to be published.

245 Both authors (HE, SL) have participated sufficiently in the work to take public responsibility  
246 for appropriate portions of the content and agreed to be accountable for all aspects of the work  
247 in ensuring that questions related to the accuracy or integrity of any part of the work are  
248 appropriately investigated and resolved.



1

2

3 **249 Abbreviations**

4 250 Superficial surgical site infection: SSSI; Periprosthetic joint infection: PJI; Total joint arthroplasty:

5

6 251 TJA; Total hip arthroplasty: THA; Total knee arthroplasty: TKA; Body mass index: BMI; American

7

8 252 Society of Anaesthesiologists classification: ASA classification; Rheumatologic disease: RA;

9

10 253 Diabetes mellitus: DM; Adjusted RR: aRR.

11

12

13

14

15

16

17

18

19

20

21

22

23

24

25

26

27

28

29

30

31

32

33

34

35

36

37

38

39

40

41

42

43

44

45

46

47

48

49

50

51

52

53

54

55

56

57

58

59

60

For peer review only

**References**

1. Carroll K, Dowsey M, Choong P, Peel T. Risk factors for superficial wound complications in hip and knee arthroplasty. *Clin Microbiol Infect*. 2014;20(2):130-5.
2. Peersman G, Laskin R, Davis J, Peterson M. Infection in total knee replacement: a retrospective review of 6489 total knee replacements. *Clin Orthop Relat Res*. 2001(392):15-23.
3. Saleh K, Olson M, Resig S, Bershadsky B, Kuskowski M, Gioe T, et al. Predictors of wound infection in hip and knee joint replacement: results from a 20 year surveillance program. *J Orthop Res*. 2002;20(3):506-15.
4. Lima AL, Oliveira PR, Carvalho VC, Saconi ES, Cabrita HB, Rodrigues MB. Periprosthetic Joint Infections. *Interdiscip Perspect Infect Dis*. 2013;2013:542796.
5. Urquhart DM, Hanna FS, Brennan SL, Wluka AE, Leder K, Cameron PA, et al. Incidence and risk factors for deep surgical site infection after primary total hip arthroplasty: a systematic review. *J Arthroplasty*. 2010;25(8):1216-22.e1-3.
6. Ridgeway S, Wilson J, Charlet A, Kafatos G, Pearson A, Coello R. Infection of the surgical site after arthroplasty of the hip. *J Bone Joint Surg Br*. 2005;87(6):844-50.
7. Cooper K, Lamagni T, Harrington P, Wloch C, Hopkins S. Surveillance of surgical site infections in NHS hospitals in England, April 2018 to March 2019. [Available from: [www.gov.uk/phe](http://www.gov.uk/phe).]
8. Phillips JE, Crane TP, Noy M, Elliott TS, Grimer RJ. The incidence of deep prosthetic infections in a specialist orthopaedic hospital: a 15-year prospective survey. *J Bone Joint Surg Br*. 2006;88(7):943-8.
9. Pulido L, Ghanem E, Joshi A, Purtill JJ, Parvizi J. Periprosthetic joint infection: the incidence, timing, and predisposing factors. *Clin Orthop Relat Res*. 2008;466(7):1710-5.
10. Jämsen E, Varonen M, Huhtala H, Lehto MU, Lumio J, Konttinen YT, et al. Incidence of prosthetic joint infections after primary knee arthroplasty. *J Arthroplasty*. 2010;25(1):87-92.

- 1  
2 281 11. Dale H, Fenstad AM, Hallan G, Havelin LI, Furnes O, Overgaard S, et al. Increasing risk of  
3  
4  
5 282 prosthetic joint infection after total hip arthroplasty. *Acta Orthop*. 2012;83(5):449-58.  
6  
7 283 12. Kong L, Cao J, Zhang Y, Ding W, Shen Y. Risk factors for periprosthetic joint infection  
8  
9 284 following primary total hip or knee arthroplasty: a meta-analysis. *Int Wound J*. 2017;14(3):529-36.  
10  
11 285 13. Kunutsor SK, Whitehouse MR, Blom AW, Beswick AD, Team I. Patient-Related Risk  
12  
13  
14 286 Factors for Periprosthetic Joint Infection after Total Joint Arthroplasty: A Systematic Review and  
15  
16 287 Meta-Analysis. *PLoS One*. 2016;11(3):e0150866.  
17  
18 288 14. Maoz G, Phillips M, Bosco J, Slover J, Stachel A, Inneh I, et al. The Otto Aufranc Award:  
19  
20  
21 289 Modifiable versus nonmodifiable risk factors for infection after hip arthroplasty.  
22  
23 290 *Clin Orthop Relat Res*. 2015;473(2):453-9.  
24  
25 291 15. Everhart JS, Altneu E, Calhoun JH. Medical comorbidities are independent preoperative risk  
26  
27  
28 292 factors for surgical infection after total joint arthroplasty.  
29  
30 293 *Clin Orthop Relat Res*. 2013;471(10):3112-9.  
31  
32 294 16. Schrama JC, Espehaug B, Hallan G, Engesaeter LB, Furnes O, Havelin LI, et al. Risk of  
33  
34  
35 295 revision for infection in primary total hip and knee arthroplasty in patients with rheumatoid arthritis  
36  
37 296 compared with osteoarthritis: a prospective, population-based study on 108,786 hip and knee joint  
38  
39 297 arthroplasties from the Norwegian Arthroplasty Register.  
40  
41  
42 298 *Arthritis Care Res (Hoboken)*. 2010;62(4):473-9.  
43  
44 299 17. Swedish Association of Local Authorities and Regions. 2020 [cited 15 May 2020]  
45  
46 300 [Available from: [www.skr.se](http://www.skr.se).]  
47  
48 301 18. Parvizi J, Tan TL, Goswami K, Higuera C, Della Valle C, Chen AF, et al. The 2018  
49  
50  
51 302 Definition of Periprosthetic Hip and Knee Infection: An Evidence-Based and Validated Criteria.  
52  
53 303 *J Arthroplasty*. 2018;33(5):1309-14.e2.  
54  
55 304 19. Resende VAC, Neto AC, Nunes C, Andrade R, Espregueira-Mendes J, Lopes S. Higher age,  
56  
57  
58 305 female gender, osteoarthritis and blood transfusion protect against periprosthetic joint infection in  
59  
60 306 total hip or knee arthroplasties: a systematic review and meta-analysis.

- 1  
2 307 Knee Surg Sports Traumatol Arthrosc. 2018.  
3  
4  
5 308 20. McClelland EE, Smith JM. Gender specific differences in the immune response to infection.  
6  
7 309 Arch Immunol Ther Exp (Warsz). 2011;59(3):203-13.  
8  
9 310 21. Anaya DA, Dellinger EP. The obese surgical patient: a susceptible host for infection.  
10  
11 311 Surg Infect (Larchmt). 2006;7(5):473-80.  
12  
13  
14 312 22. Yayac M, Aggarwal R, Parvizi J. How viable is pre-surgery weight reduction for the  
15  
16 313 reduction of periprosthetic joint infection risk after total joint arthroplasty?  
17  
18 314 Expert Rev Med Devices. 2020;17(3):149-51.  
19  
20  
21 315 23. Hartemink N, Boshuizen HC, Nagelkerke NJ, Jacobs MA, van Houwelingen HC.  
22  
23 316 Combining risk estimates from observational studies with different exposure cutpoints: a meta-  
24  
25 317 analysis on body mass index and diabetes type 2. Am J Epidemiol. 2006;163(11):1042-52.  
26  
27  
28 318 24. Khaodhiar L, McCowen KC, Blackburn GL. Obesity and its comorbid conditions.  
29  
30 319 Clin Cornerstone. 1999;2(3):17-31.  
31  
32 320 25. Guh DP, Zhang W, Bansback N, Amarsi Z, Birmingham CL, Anis AH. The incidence of co-  
33  
34 321 morbidities related to obesity and overweight: a systematic review and meta-analysis.  
35  
36 322 BMC Public Health. 2009;9:88.  
37  
38  
39 323 26. Dowsey MM, Choong PF. Obesity is a major risk factor for prosthetic infection after  
40  
41 324 primary hip arthroplasty. Clin Orthop Relat Res. 2008;466(1):153-8.  
42  
43  
44 325 27. Patel VP, Walsh M, Sehgal B, Preston C, DeWal H, Di Cesare PE. Factors associated with  
45  
46 326 prolonged wound drainage after primary total hip and knee arthroplasty.  
47  
48 327 J Bone Joint Surg Am. 2007;89(1):33-8.  
49  
50  
51 328 28. Sayed-Noor AS, Mukka S, Mohaddes M, Kärrholm J, Rolfson O. Body mass index is  
52  
53 329 associated with risk of reoperation and revision after primary total hip arthroplasty: a study of the  
54  
55 330 Swedish Hip Arthroplasty Register including 83,146 patients. Acta Orthop. 2019;90(3):220-5.  
56  
57  
58  
59  
60

1  
2  
3  
4  
5  
6  
7  
8  
9  
10  
11  
12  
13  
14  
15  
16  
17  
18  
19  
20  
21  
22  
23  
24  
25  
26  
27  
28  
29  
30  
31  
32  
33  
34  
35  
36  
37  
38  
39  
40  
41  
42  
43  
44  
45  
46  
47  
48  
49  
50  
51  
52  
53  
54  
55  
56  
57  
58  
59  
60

- 331 29. Shohat N, Fleischman A, Tarabichi M, Tan TL, Parvizi J. Weighing in on Body Mass Index  
and Infection After Total Joint Arthroplasty: Is There Evidence for a Body Mass Index Threshold?  
Clin Orthop Relat Res. 2018;476(10):1964-9.
- 334 30. Guirro P, Hinarejos P, Pelfort X, Leal-Blanquet J, Torres-Claramunt R, Puig-Verdie L.  
Long term follow-up of successfully treated superficial wound infections following TKA.  
J Arthroplasty. 2015;30(1):101-3.
- 337 31. Almustafa MA, Ewen AM, Deakin AH, Picard F, Clarke JV, Mahmood FF. Risk Factors for  
Surgical Site Infection Following Lower Limb Arthroplasty: A Retrospective Cohort Analysis of  
3932 Lower Limb Arthroplasty Procedures in a High Volume Arthroplasty Unit.  
J Arthroplasty. 2018;33(6):1861-7.
- 341 32. Jämsen E, Huhtala H, Puolakka T, Moilanen T. Risk factors for infection after knee  
arthroplasty. A register-based analysis of 43,149 cases. J Bone Joint Surg Am. 2009;91(1):38-47.
- 343 33. Kärrholm J, Rogmark C, Nauclér E, Vinblad J, Mohaddes M, Rolfson R. Swedish Hip  
Arthroplasty Register. Annual report 2018. [Available from: [www.shpr.se](http://www.shpr.se).]

1  
2  
3  
4  
5  
6  
7  
8  
9  
10  
11  
12  
13  
14  
15  
16  
17  
18  
19  
20  
21  
22  
23  
24  
25  
26  
27  
28  
29  
30  
31  
32  
33  
34  
35  
36  
37  
38  
39  
40  
41  
42  
43  
44  
45  
46  
47  
48  
49  
50  
51  
52  
53  
54  
55  
56  
57  
58  
59  
60

347 **Figure legends**

348 Figure 1. Directed acyclic graph for selecting confounders.

349 The circle with an arrow indicates the exposure; the circles with an (I) illustrate outcomes; and the circles  
350 without text indicate confounders used in the statistical model.

351

352 Figure 2. Proportion of SSSI and PJI in the total cohort.

353

For peer review only

1  
2  
3  
4  
5  
6  
7  
8  
9  
10  
11  
12  
13  
14  
15  
16  
17  
18  
19  
20  
21  
22  
23  
24  
25  
26  
27  
28  
29  
30  
31  
32  
33  
34  
35  
36  
37  
38  
39  
40  
41  
42  
43  
44  
45  
46  
47  
48  
49  
50  
51  
52  
53  
54  
55  
56  
57  
58  
59  
60

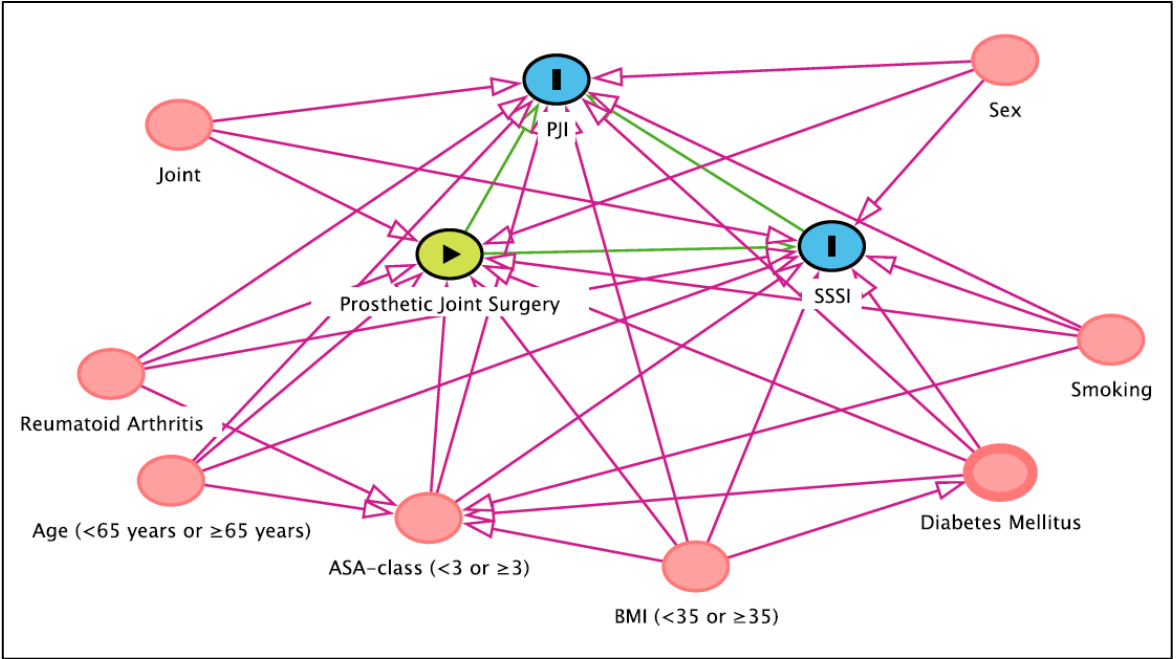

Peer review only

1  
2  
3  
4  
5  
6  
7  
8  
9  
10  
11  
12  
13  
14  
15  
16  
17  
18  
19  
20  
21  
22  
23  
24  
25  
26  
27  
28  
29  
30  
31  
32  
33  
34  
35  
36  
37  
38  
39  
40  
41  
42  
43  
44  
45  
46  
47  
48  
49  
50  
51  
52  
53  
54  
55  
56  
57  
58  
59  
60

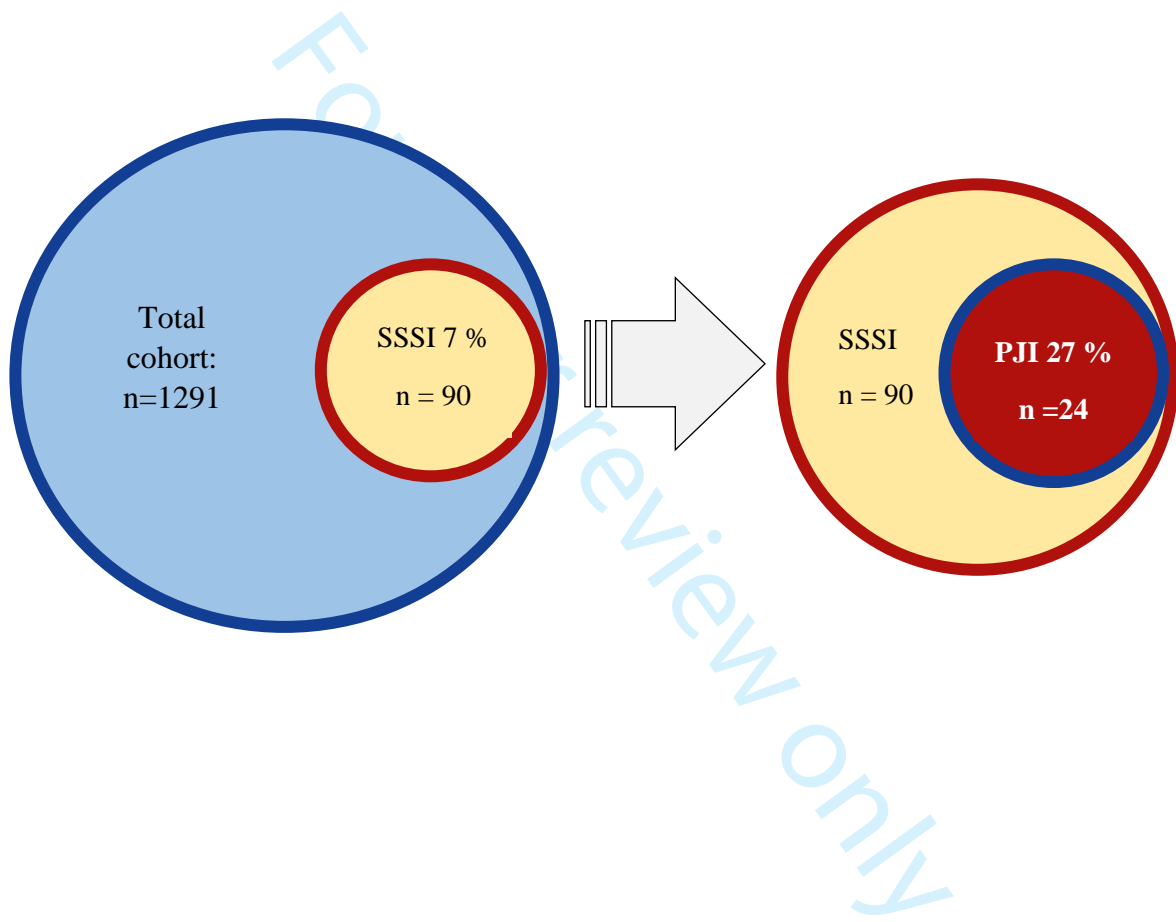



**STROBE 2007 (v4) Statement—Checklist of items that should be included in reports of *cross-sectional studies***

| Section/Topic                | Item # | Recommendation                                                                                                                                                                       | Reported on page # |
|------------------------------|--------|--------------------------------------------------------------------------------------------------------------------------------------------------------------------------------------|--------------------|
| <b>Title and abstract</b>    | 1      | (a) Indicate the study’s design with a commonly used term in the title or the abstract                                                                                               | 1                  |
|                              |        | (b) Provide in the abstract an informative and balanced summary of what was done and what was found                                                                                  | 2                  |
| <b>Introduction</b>          |        |                                                                                                                                                                                      |                    |
| Background/rationale         | 2      | Explain the scientific background and rationale for the investigation being reported                                                                                                 | 3                  |
| Objectives                   | 3      | State specific objectives, including any prespecified hypotheses                                                                                                                     | 3                  |
| <b>Methods</b>               |        |                                                                                                                                                                                      |                    |
| Study design                 | 4      | Present key elements of study design early in the paper                                                                                                                              | 4                  |
| Setting                      | 5      | Describe the setting, locations, and relevant dates, including periods of recruitment, exposure, follow-up, and data collection                                                      | 4                  |
| Participants                 | 6      | (a) Give the eligibility criteria, and the sources and methods of selection of participants                                                                                          | 5                  |
| Variables                    | 7      | Clearly define all outcomes, exposures, predictors, potential confounders, and effect modifiers. Give diagnostic criteria, if applicable                                             | 5                  |
| Data sources/<br>measurement | 8*     | For each variable of interest, give sources of data and details of methods of assessment (measurement). Describe comparability of assessment methods if there is more than one group | 5                  |
| Bias                         | 9      | Describe any efforts to address potential sources of bias                                                                                                                            | na                 |
| Study size                   | 10     | Explain how the study size was arrived at                                                                                                                                            | 5                  |
| Quantitative variables       | 11     | Explain how quantitative variables were handled in the analyses. If applicable, describe which groupings were chosen and why                                                         | na                 |
| Statistical methods          | 12     | (a) Describe all statistical methods, including those used to control for confounding                                                                                                | 5                  |
|                              |        | (b) Describe any methods used to examine subgroups and interactions                                                                                                                  | 5                  |
|                              |        | (c) Explain how missing data were addressed                                                                                                                                          | 5                  |
|                              |        | (d) If applicable, describe analytical methods taking account of sampling strategy                                                                                                   | na                 |
|                              |        | (e) Describe any sensitivity analyses                                                                                                                                                | na                 |
| <b>Results</b>               |        |                                                                                                                                                                                      |                    |

|                          |     |                                                                                                                                                                                                                                                                                                                                                                                                               |              |
|--------------------------|-----|---------------------------------------------------------------------------------------------------------------------------------------------------------------------------------------------------------------------------------------------------------------------------------------------------------------------------------------------------------------------------------------------------------------|--------------|
| Participants             | 13* | (a) Report numbers of individuals at each stage of study—eg numbers potentially eligible, examined for eligibility, confirmed eligible, included in the study, completing follow-up, and analysed<br>(b) Give reasons for non-participation at each stage<br>(c) Consider use of a flow diagram                                                                                                               | 6            |
| Descriptive data         | 14* | (a) Give characteristics of study participants (eg demographic, clinical, social) and information on exposures and potential confounders<br>(b) Indicate number of participants with missing data for each variable of interest                                                                                                                                                                               | 6            |
| Outcome data             | 15* | Report numbers of outcome events or summary measures                                                                                                                                                                                                                                                                                                                                                          | 7            |
| Main results             | 16  | (a) Give unadjusted estimates and, if applicable, confounder-adjusted estimates and their precision (eg, 95% confidence interval). Make clear which confounders were adjusted for and why they were included<br>(b) Report category boundaries when continuous variables were categorized<br>(c) If relevant, consider translating estimates of relative risk into absolute risk for a meaningful time period | 8<br>5<br>na |
| Other analyses           | 17  | Report other analyses done—eg analyses of subgroups and interactions, and sensitivity analyses                                                                                                                                                                                                                                                                                                                | 10           |
| <b>Discussion</b>        |     |                                                                                                                                                                                                                                                                                                                                                                                                               |              |
| Key results              | 18  | Summarise key results with reference to study objectives                                                                                                                                                                                                                                                                                                                                                      | 11           |
| Limitations              | 19  | Discuss limitations of the study, taking into account sources of potential bias or imprecision. Discuss both direction and magnitude of any potential bias                                                                                                                                                                                                                                                    | 12           |
| Interpretation           | 20  | Give a cautious overall interpretation of results considering objectives, limitations, multiplicity of analyses, results from similar studies, and other relevant evidence                                                                                                                                                                                                                                    | 11           |
| Generalisability         | 21  | Discuss the generalisability (external validity) of the study results                                                                                                                                                                                                                                                                                                                                         | 12           |
| <b>Other information</b> |     |                                                                                                                                                                                                                                                                                                                                                                                                               |              |
| Funding                  | 22  | Give the source of funding and the role of the funders for the present study and, if applicable, for the original study on which the present article is based                                                                                                                                                                                                                                                 | 13           |

\*Give information separately for cases and controls in case-control studies and, if applicable, for exposed and unexposed groups in cohort and cross-sectional studies.

**Note:** An Explanation and Elaboration article discusses each checklist item and gives methodological background and published examples of transparent reporting. The STROBE checklist is best used in conjunction with this article (freely available on the Web sites of PLoS Medicine at <http://www.plosmedicine.org/>, Annals of Internal Medicine at <http://www.annals.org/>, and Epidemiology at <http://www.epidem.com/>). Information on the STROBE Initiative is available at [www.strobe-statement.org](http://www.strobe-statement.org).

# BMJ Open

## Patient-related factors associated with superficial surgical site infection and the progression into a periprosthetic joint infection after elective primary total joint arthroplasty: a single-centre, retrospective study in Sweden

|                                 |                                                                                                                                                                                                                                             |
|---------------------------------|---------------------------------------------------------------------------------------------------------------------------------------------------------------------------------------------------------------------------------------------|
| Journal:                        | <i>BMJ Open</i>                                                                                                                                                                                                                             |
| Manuscript ID                   | bmjopen-2022-060754.R1                                                                                                                                                                                                                      |
| Article Type:                   | Original research                                                                                                                                                                                                                           |
| Date Submitted by the Author:   | 07-May-2022                                                                                                                                                                                                                                 |
| Complete List of Authors:       | Eriksson, Hannah; Uppsala University Department of Surgical Sciences, Department of Surgical Sciences/Orthopaedics<br>Lazarinis, Stergios; Uppsala University Department of Surgical Sciences, Department of Surgical Sciences/Orthopaedics |
| <b>Primary Subject Heading</b>: | Infectious diseases                                                                                                                                                                                                                         |
| Secondary Subject Heading:      | Infectious diseases                                                                                                                                                                                                                         |
| Keywords:                       | Musculoskeletal disorders < ORTHOPAEDIC & TRAUMA SURGERY, Adult orthopaedics < ORTHOPAEDIC & TRAUMA SURGERY, Hip < ORTHOPAEDIC & TRAUMA SURGERY, Knee < ORTHOPAEDIC & TRAUMA SURGERY                                                        |
|                                 |                                                                                                                                                                                                                                             |

SCHOLARONE™  
Manuscripts



I, the Submitting Author has the right to grant and does grant on behalf of all authors of the Work (as defined in the below author licence), an exclusive licence and/or a non-exclusive licence for contributions from authors who are: i) UK Crown employees; ii) where BMJ has agreed a CC-BY licence shall apply, and/or iii) in accordance with the terms applicable for US Federal Government officers or employees acting as part of their official duties; on a worldwide, perpetual, irrevocable, royalty-free basis to BMJ Publishing Group Ltd ("BMJ") its licensees and where the relevant Journal is co-owned by BMJ to the co-owners of the Journal, to publish the Work in this journal and any other BMJ products and to exploit all rights, as set out in our [licence](#).

The Submitting Author accepts and understands that any supply made under these terms is made by BMJ to the Submitting Author unless you are acting as an employee on behalf of your employer or a postgraduate student of an affiliated institution which is paying any applicable article publishing charge ("APC") for Open Access articles. Where the Submitting Author wishes to make the Work available on an Open Access basis (and intends to pay the relevant APC), the terms of reuse of such Open Access shall be governed by a Creative Commons licence – details of these licences and which [Creative Commons](#) licence will apply to this Work are set out in our licence referred to above.

Other than as permitted in any relevant BMJ Author's Self Archiving Policies, I confirm this Work has not been accepted for publication elsewhere, is not being considered for publication elsewhere and does not duplicate material already published. I confirm all authors consent to publication of this Work and authorise the granting of this licence.

1  
2  
3 1 Patient-related factors associated with superficial surgical site infection  
4  
5 2 and the progression into a periprosthetic joint infection after elective  
6  
7 3 primary total joint arthroplasty: a single-centre, retrospective study in  
8  
9  
10 4 Sweden  
11  
12 5

13  
14 6 Running title: Patient-related factors associated with superficial surgical site infection and the  
15  
16 7 progression into a periprosthetic joint infection after elective primary total joint arthroplasty  
17  
18 8

19 9 Hannah K Eriksson MD, [hannah.eriksson@surgsci.uu.se](mailto:hannah.eriksson@surgsci.uu.se)

20  
21 10 Stergios Lazarinis MD, PhD, [lazarinis.stergios@surgsci.uu.se](mailto:lazarinis.stergios@surgsci.uu.se)

22  
23 11 Department of Surgical Sciences/Orthopaedics, Uppsala University Hospital, Uppsala,  
24  
25 12 Sweden.  
26  
27 13

28 14 **Declarations**

29  
30 15 None of the authors have any conflict of interest to declare.

31 16 *Ethics approval*

32  
33 17 The study design was reviewed and approved by the Human Research Ethics Committee in  
34  
35 18 Uppsala, Sweden, Nr: 2019-01425.  
36  
37 19

38 20 First author:

39  
40 21 H.K Eriksson

41  
42 22 Department of Surgical Sciences/Orthopaedics

43  
44 23 Uppsala University Hospital

45  
46 24 SE-751 85 Uppsala, Sweden

47 25 Email: [hannah.eriksson@surgsci.uu.se](mailto:hannah.eriksson@surgsci.uu.se)  
48  
49 26  
50  
51  
52  
53  
54  
55  
56  
57  
58  
59  
60

## 27 Abstract

28 **Objectives:** The incidence of superficial surgical site infection (SSSI) may increase the risk of  
29 periprosthetic joint infection (PJI). The objective of this study is to identify patient-related risk factors  
30 associated with SSSI and investigate their correlation with the progression of PJI. **Design:** In this  
31 retrospective study 1,191 elective hip and knee prostheses were included. Patients were interviewed  
32  $\geq 3$  months after surgery to answer questions about the postoperative period. Patients' records were  
33 reviewed to determine whether there had been any documentation of difficulties with wound-healing  
34 or antibiotics were prescribed to treat an infection related to arthroplasty surgery. Diagnosed PJI was  
35 determined by an orthopaedic surgeon in consultation with a consultant in infectious diseases.

36 **Setting:** This study was performed at Uppsala University Hospital.

37 **Participants:** 1,191 joints were included of which, 433 were knees and 758 hips. **Primary and  
38 secondary outcome measures:** Which of the patient-related risk factors; joint, age, sex, the  
39 American Society of Anaesthesiologists (ASA) classification body mass index (BMI), smoking,  
40 diabetes and rheumatic disease associated with 1) superficial surgical site infection and 2) the  
41 progress into periprosthetic joint infection.

42 **Results:** 84 (7%) of the total cohort developed an SSSI, of which 24 (29%) progressed to a PJI.  
43 Factors found with increased adjusted risk ratio (aRR) for SSSI were: knee surgery (1.7; 95% CI: 1.1  
44 – 2.7), age  $\geq 65$  years (1.7; 95% CI: 1.1 – 2.8), BMI  $\geq 30$  (1.9; 95% CI: 1.0 – 3.4) and ASA  
45 classification  $\geq 3$  (1.7; 95% CI: 1.0 – 2.9). The factor with significant aRR for progression from SSSI  
46 to PJI was ASA classification  $\geq 3$  (3.3; 95% CI: 1.0 – 10.3).

47 **Conclusions:** Patients developing SSSI have a great risk of progress into PJI. Older obese patients  
48 with high ASA classification considered for elective total knee arthroplasty seem to have an increased  
49 risk of developing SSSI. Patients with a high ASA classification have the highest risk of progressing  
50 from SSSI into PJI.

## 51 **Strengths and limitations of this study**

- 52 • Strengths of this study are a large cohort size (n=1191)
- 53 • Meticulous follow-up of each patient and exclusive inclusion of patients with primary elective  
54 arthroplasty surgery on hip or knee.
- 55 • Limitations of this study are the retrospective study design, small number of infections leading  
56 to a potential risk of a type II error.

## 57 **Keywords**

58 Periprosthetic joint infection (PJI), superficial surgical site infection (SSSI), total joint arthroplasty  
59 (TJA), risk factors.

## 60 **Introduction**

61 Infection after TJA can be defined as either superficial involving skin or subcutaneous tissue only (a  
62 superficial surgical site infection, SSSI) or deep (periprosthetic joint infection, PJI) with deep soft  
63 tissue involvement (e.g., fascial and muscle layers) and the prosthesis. The incidence of SSSI after  
64 TJA can vary from 1 to 10% (1-3) and may increase the risk of subsequent PJI by up to 35 times (3).  
65 The frequency of PJI ranges between 1 and 5% (4-7). Patient-related risk factors, such as obesity,  
66 rheumatoid arthritis (RA), smoking, male sex, age, alcohol abuse, American Society of  
67 Anaesthesiologists (ASA) classification >2 and diabetes mellitus (DM) (8-15), have been described  
68 as risk factors for PJI but not confirmed as risk factors for SSSI. In clinical practice priority should  
69 be to identify patients at high risk for SSSI and PJI, aiming for patient optimisation and the  
70 opportunity to manage modifiable risk factors since it is essential to seize any opportunity to optimise  
71 all prerequisites for the best achievable surgical outcome. Our primary objectives were to 1)  
72 determine which patient-related factors are linked to SSSI and 2) investigate the progression into a  
73 PJI.

## 74 **Methods**

### 75 *Study design*

76 This retrospective study of primary elective prostheses in hip or knee joints included patients in a  
77 national project designed to lower the incidence of hospital-related infections (16). Patients included  
78 in this study were treated at Uppsala University hospital from November 2008 to December 2012,  
79 and interviewed  $\geq 3$  months after surgery to answer questions about the postoperative period. The  
80 patients' records were reviewed to determine whether there had been any documentation of  
81 difficulties with wound-healing or whether antibiotics were prescribed to treat an infection related to  
82 arthroplasty surgery. An orthopedic consultant reviewed all information from the patients' records  
83 (recorded from general practitioners or orthopedic consultants) including possible wound healing  
84 problems or antibiotic prescription due to suspected postoperative infection. This information and the  
85 results of the patient interview were taken under consideration in order to determine the occurrence  
86 of SSSI. The diagnosed PJI was determined by a consultant orthopaedic surgeon in consultation with  
87 a consultant in infectious diseases. In a retrospective review of patient records selected patients  
88 fulfilled the criteria for PJI (17), but those criteria had not been used at diagnosis. Patient records  
89 were reviewed for patient-related risk factors while a local arthroplasty register was used to obtain  
90 perioperative information about whether revision surgery had been necessary due to persistent PJI.  
91 Follow-up was a minimum of 5 years.

92 This study was limited to patient-related risk factors associated with developing an SSSI and focused  
93 on those factors that might be possible to avoid or optimise preoperatively.

94 Consent for publication was considered in the application to the Human Research Ethics

95 Committee. However, no consent, verbal or written was needed, due to the retrospective study

96 design. The study design was reviewed and approved by the Human Research Ethics Committee  
97 (Dnr: 2019-01425).

98

99



1  
2 100 *Patient and Public Involvement*

3  
4  
5 101 Patients or the public were not involved in the development of the research question, outcome  
6  
7 102 measures, the design, conduct, reporting, or dissemination plans of our research. The results of this  
8  
9 103 study will not be separately disseminated to study participants.

10  
11  
12 104 *Study population*

13  
14 105 1,191 joints were included, of which 664 were men, 527 women, 433 were knees and 758 hips.

15  
16 106 Only cemented components were used in all knees. Hip prostheses were cemented, cementless or  
17  
18 107 hybrids. In all cemented prostheses antibiotic-loaded cement with gentamycin was applied. All  
19  
20 108 patients received systemic pre- and perioperative antibiotic prophylaxis in accordance with national  
21  
22 109 guidelines (cloxacillin, and in the case of penicillin allergy, clindamycin).

23  
24  
25 110 *Confounders*

26  
27  
28 111 Such patient-related factors as joint, sex, age, BMI, RA, ASA classification, smoking and DM were  
29  
30 112 considered clinically relevant confounders in the correlation between arthroplasty surgery and SSSI  
31  
32 113 or PJI. These specific patient-related variables have previously been linked to exposure and outcome  
33  
34 114 and are not considered in the causal pathway between potential risk factors and outcome (Figure 1).  
35  
36 115 Relevant confounders were analysed as categorical variables: ASA classification:  $<3$  or  $\geq 3$ , for BMI  
37  
38 116 the WHO (World Health Organization)-classification was used and divided into the following groups:  
39  
40 117 BMI $<25$  (under- and normal weight),  $25 \leq \text{BMI} < 30$  (overweight) and BMI $\geq 30$  (obesity class I-III),  
41  
42 118 and Age:  $<65$  years or  $\geq 65$  years. Patients with DM included both type 1 and 2 (drug- or diet-treated).  
43  
44

45  
46 119 *Statistics*

47  
48 120 Descriptive statistics were used to summarise and report demographic characteristics.

49  
50 121 In an initial analysis logistic regression was performed, entering all covariates as singular variables.  
51  
52 122 Crude risk ratios (RRs) for SSSI and PJI were calculated for each variable with 95% confidence  
53  
54 123 intervals (95% CIs). In the next step, the covariates were entered into the regression model, with RRs  
55  
56 124 mutually adjusted for all covariates. Adjusted RRs (aRRs) for each covariate were calculated for the  
57  
58 125 occurrence of SSSI or PJI and any progression of SSSI into PJI.  
59  
60

1

2

3

4

5

6

7

8

9

10

11

12

13

14

15

16

17

18

19

20

21

22

23

24

25

26

27

28

29

30

31

32

33

34

35

36

37

38

39

40

41

42

43

44

45

46

47

48

49

50

51

52

53

54

55

56

57

58

59

60

126 All statistical analyses were performed using SPSS (version 26.0) and p-values  $\leq 0.05$  were  
 127 considered statistically significant.

## 128 Results

129 The total number of surgeries for prosthetic hip or knee joints was 1,191. 84 joints (7%) developed  
 130 an SSSI and 24 (2%) a PJI. Of the 84 joints with SSSI, 24 (29%) progressed to a PJI (Figure 2).

131 In the hip cohort (758) 40 joints (5%) developed an SSSI, and 11 (2%) a PJI. In the knee cohort (433),  
 132 44 joints (10%) developed an SSSI and 13 (3%) a PJI (Table 1).

133

**Table 1. Number of postoperative infections**

| Variable                   | SSSI       | PJI       |
|----------------------------|------------|-----------|
| <b>Total cohort (1191)</b> | 84 (7.1%)  | 24 (2.0%) |
| <b>Hip (758)</b>           | 40 (5.3%)  | 11 (1.5%) |
| <b>Knee (433)</b>          | 44 (10.4%) | 13 (3.1%) |

SSSI (superficial surgical site infection), PJI (periprosthetic joint infection).

134

135

136

137

34

35

36

37

38

39

40

41

42

43

44

45

46

47

48

49

50

51

52

53

54

55

56

57

58

59

60

Demographic characteristics of the cohorts are outlined in Table 2.

**Table 2. Demographic characteristics**

| Variable                       | Total cohort | Hip           | Knee          | Range |
|--------------------------------|--------------|---------------|---------------|-------|
|                                | n = 1191     | n = 758 (64%) | n = 433 (36%) |       |
| <b>Mean age (year)</b>         | 63           | 61            | 65            | 18–96 |
| <b>Age</b>                     |              |               |               |       |
| <65                            | 673 (56%)    | 447 (59%)     | 226 (52%)     |       |
| ≥65                            | 518 (44%)    | 331 (41%)     | 207 (48%)     |       |
| <b>ASA-class<sup>a</sup></b>   |              |               |               |       |
| ≤2                             | 964 (81%)    | 631 (84%)     | 333 (78%)     |       |
| ≥3                             | 210 (18%)    | 117 (16%)     | 93 (22%)      |       |
| <b>Mean Body mass index</b>    | 28           | 27            | 29            | 14–51 |
| <b>BMI</b>                     |              |               |               |       |
| BMI<25 <sup>b</sup>            | 356 (30%)    | 259 (34%)     | 97 (22%)      |       |
| 25≤BMI<30                      | 474 (40%)    | 307 (41%)     | 167 (39%)     |       |
| BMI≥30                         | 361 (30%)    | 192 (25%)     | 169 (39%)     |       |
| <b>Sex</b>                     |              |               |               |       |
| Woman                          | 664 (56%)    | 387 (51%)     | 277 (64%)     |       |
| Man                            | 527 (44%)    | 371 (49%)     | 156 (36%)     |       |
| <b>Smoking<sup>c</sup></b>     |              |               |               |       |
| No                             | 1064 (90%)   | 673 (89%)     | 391 (90%)     |       |
| Yes                            | 122 (10%)    | 81 (11%)      | 41 (10%)      |       |
| <b>Diabetes</b>                |              |               |               |       |
| No                             | 1067 (90%)   | 686 (91%)     | 381 (88%)     |       |
| Yes                            | 124 (10%)    | 72 (9%)       | 52 (12%)      |       |
| <b>Rheumatological disease</b> |              |               |               |       |
| No                             | 1052 (88%)   | 690 (91%)     | 362 (84%)     |       |
| Yes                            | 139 (12%)    | 68 (9%)       | 71 (16%)      |       |

ASA (American Society of Anaesthesiologists), BMI (Body mass index).

<sup>a</sup> missing data in 17 cases

<sup>b</sup> underweight 17 cases (BMI under 18.5)

<sup>c</sup> missing data in 5 cases

1  
2 147 *Risk factors for SSSI*

3  
4  
5 148 Risk factors with a significant crude RR for developing SSSI were knee surgery (2.0; 95% CI: 1.3 –  
6  
7 149 3.2), age  $\geq 65$  years (1.8; 95% CI: 1.2 – 2.8), ASA classification  $\geq 3$  (2.4; 95% CI: 1.5 – 3.8) and  
8  
9 150 rheumatic disease (1.9; 95% CI: 1.1 – 3.3). Adjusting for all covariates, factors with significant aRRs  
10  
11 151 for SSSI were knee surgery (1.7; 95% CI 1.1 – 2.7), age  $\geq 65$  years (1.7; 95% CI: 1.1 – 2.8), ASA  
12  
13 classification  $\geq 3$  (1.7; 95% CI: 1.0 – 2.9) and BMI  $\geq 30$  (1.9; 95% CI: 1.0 – 3.4) (Table 3).  
14 152

15  
16 **Table 3. Risk ratio (RR) for SSSI**

| Variable                       | Crude RR<br>(95 % CI) | P-value      | Adjusted RR<br>(95 % CI) | P-value      |
|--------------------------------|-----------------------|--------------|--------------------------|--------------|
| <b>No SSSI</b>                 | 1107 (9%)             |              |                          |              |
| <b>SSSI</b>                    | 84 (7%)               |              |                          |              |
| <b>Joint</b>                   |                       |              |                          |              |
| Hip                            | ref                   |              | ref                      |              |
| Knee                           | 2.0 (1.3 - 3.2)       | <b>0.002</b> | 1.7 (1.1 - 2.7)          | <b>0.022</b> |
| <b>Age</b>                     |                       |              |                          |              |
| $<65$                          | ref                   |              | ref                      |              |
| $\geq 65$                      | 1.8 (1.2 - 2.8)       | <b>0.010</b> | 1.7 (1.1 - 2.8)          | <b>0.024</b> |
| <b>ASA class<sup>a</sup></b>   |                       |              |                          |              |
| $\leq 2$                       | ref                   |              | ref                      |              |
| $\geq 3$                       | 2.4 (1.5 - 3.8)       | <b>0.001</b> | 1.7 (1.0 - 2.9)          | <b>0.038</b> |
| <b>Body mass index</b>         |                       |              |                          |              |
| BMI $< 25$                     | ref                   |              | ref                      |              |
| $25 \leq \text{BMI} < 30$      | 1.4 (0.8 - 2.2)       | 0.211        | 1.1 (0.6 - 2.0)          | 0.780        |
| BMI $\geq 30$                  | 2.3 (0.9 - 5.5)       | 0.075        | 1.9 (1.0 - 3.4)          | <b>0.045</b> |
| <b>Sex</b>                     |                       |              |                          |              |
| Woman                          | ref                   |              | ref                      |              |
| Men                            | 1.1 (0.7 - 1.7)       | 0.677        | 1.1 (0.8 - 2.1)          | 0.298        |
| <b>Smoking<sup>b</sup></b>     |                       |              |                          |              |
| No                             | ref                   |              | ref                      |              |
| Yes                            | 1.1 (0.5 - 2.3)       | 0.811        | 1.1 (0.5 - 2.3)          | 0.841        |
| <b>Diabetes</b>                |                       |              |                          |              |
| No                             | ref                   |              | ref                      |              |
| Yes                            | 1.6 (0.9 - 3.1)       | 0.118        | 1.1 (0.6 - 2.2)          | 0.753        |
| <b>Rheumatological disease</b> |                       |              |                          |              |
| No                             | ref                   |              | ref                      |              |
| Yes                            | 1.9 (1.1 - 3.3)       | <b>0.031</b> | 1.7 (0.9 - 3.1)          | 0.089        |

153 ASA (American Society of Anaesthesiologists), BMI (Body mass index).

154 <sup>a</sup>missing data in 17 cases

155 <sup>b</sup>missing data in 5 cases

156 *Risk factors for PJI*

157 The only risk factor with a significant crude RR for the development of PJI was ASA classification  
158  $\geq 3$  (4.8; 95% CI: 2.1 – 10.9). Factors with significant aRRs for PJI were ASA classification  $\geq 3$  (3.8;  
159 95% CI: 1.6 – 9.1), and male sex (2.8; 95% CI: 1.2 – 6.9) (Supplementary table 1).

1  
2 160 *Risk factors for PJI in patients with SSSI*

3  
4  
5 161 In the group of patients with SSSI, the only risk factor with a significant crude RR for the development  
6  
7 162 of PJI was ASA classification  $\geq 3$  (3.0; 95% CI: 1.1 – 8.1). The adjusted relative risk shown for ASA  
8  
9 163 classification was (3.3; 95% CI: 1.0 – 10.3) (Table 4).

11  
12 **Table 4. Risk ratio (RR) for PJI in patients with SSSI**

| Variable                       | Crude RR<br>(95 % CI) | P-value      | Adjusted RR<br>(95 % CI) | P-value      |
|--------------------------------|-----------------------|--------------|--------------------------|--------------|
| <b>SSSI - no PJI</b> 60 (71%)  |                       |              |                          |              |
| <b>SSSI - PJI</b> 24 (29%)     |                       |              |                          |              |
| <b>Joint</b>                   |                       |              |                          |              |
| Hip                            | ref                   |              | ref                      |              |
| Knee                           | 1.1 (0.4 – 2.9)       | 0.836        | 1.3 (0.4 – 3.6)          | 0.663        |
| <b>Age</b>                     |                       |              |                          |              |
| <65                            | ref                   |              | ref                      |              |
| $\geq 65$                      | 1.5 (0.6 – 3.9)       | 0.404        | 2.0 (0.7 – 6.2)          | 0.212        |
| <b>ASA-class</b>               |                       |              |                          |              |
| $\leq 2$                       | ref                   |              | ref                      |              |
| $\geq 3$                       | 3.0 (1.1 – 8.1)       | <b>0.030</b> | 3.3 (1.0 – 10.3)         | <b>0.044</b> |
| <b>Body Mass Index</b>         |                       |              |                          |              |
| BMI<25                         | ref                   |              | ref                      |              |
| 25 $\leq$ BMI<30               | 1.7 (0.6 – 5.0)       | 0.309        | 2.3 (0.5 – 9.6)          | 0.264        |
| BMI $\geq 30$                  | 1.2 (0.5 – 3.1)       | 0.728        | 1.8 (0.5 – 7.1)          | 0.411        |
| <b>Sex</b>                     |                       |              |                          |              |
| Woman                          | ref                   |              | ref                      |              |
| Men                            | 2.5 (0.9 – 6.6)       | 0.065        | 2.8 (0.9 – 8.3)          | 0.064        |
| <b>Smoking</b>                 |                       |              |                          |              |
| No                             | ref                   |              | ref                      |              |
| Yes                            | 4.9 (0.5 – 51.1)      | 0.188        | 5.3 (0.5 – 54.4)         | 0.160        |
| <b>Diabetes</b>                |                       |              |                          |              |
| No                             | ref                   |              | ref                      |              |
| Yes                            | 0.6 (0.2 – 2.0)       | 0.394        | 1.3 (0.3 – 5.7)          | 0.774        |
| <b>Rheumatological disease</b> |                       |              |                          |              |
| No                             | ref                   |              | ref                      |              |
| Yes                            | 1.2 (0.4 – 3.8)       | 0.792        | 1.1 (0.3 – 4.7)          | 0.883        |

14  
15  
16  
17  
18  
19  
20  
21  
22  
23  
24  
25  
26  
27  
28  
29  
30  
31  
32  
33  
34  
35  
36  
37  
38  
39  
40  
41  
42  
43  
44  
45  
46 164 ASA (American Society of Anaesthesiologists), BMI (Body mass index).

47 165

48  
49  
50 166

1

## 2 167 **Discussion**

3

4  
5 168 Identifying, mitigating, and optimising amenable risk factors for SSSI and PJI is a highly desirable  
6  
7 169 approach for prevention of this devastating complication. The results of our study is relevant and  
8  
9  
10 170 offer new insight concerning the relationship between patient-related risk factors for SSSI and their  
11  
12 171 correlation to the risk of PJI development. The risk and consequences of PJI after TJA is well  
13  
14 172 described earlier (2, 5, 12). Further, the occurrence of SSSI is shown to increase the risk of  
15  
16 173 subsequent PJI by up to 35 times (3). However, factors affecting the progression of SSSI into PJI  
17  
18  
19 174 have not been presented before. Identification and optimisation of risk factors for SSSI may decrease  
20  
21 175 the risk of subsequent PJI.

22

### 23 176 *Patient related risk factors for superficial surgical site infection*

24

25  
26 177 This study shows that knee surgery, age >65 years, a high ASA classification and obesity are  
27  
28 178 independent risk factors for the development of SSSI after elective primary joint arthroplasty.

29

30 179 Knee surgery seems to be a risk factor for developing SSSI after elective primary arthroplasty. Earlier  
31  
32 180 studies have shown patients with knee prostheses to have a higher risk of PJI and to be in greater need  
33  
34  
35 181 of revision surgery than patients with hip prostheses (6, 8, 11, 18). Since there is less soft tissue  
36  
37 182 around the knee than around the hip, meaning a shorter distance between skin and joint it is reasonable  
38  
39  
40 183 that the risk for superficial infection also is increased. The blood circulation around the knee area is  
41  
42 184 more exposed to impact than the hip area and the perfusion is easier to disturb. Increased tourniquet  
43  
44 185 time has been identified as an individual risk factor for deep infection and impaired wound healing  
45  
46 186 and prolonged wound discharge after total knee arthroplasty (1), but this analysis is excluded from  
47  
48  
49 187 this study due to lack of this information.

50

51 188 Age as a significant risk factor for SSSI shown in this study is congruent with results from a large  
52  
53 189 (n=1,000) retrospective study (1) by Carroll et al. Elderly patients may have pre-existing medical  
54  
55 190 conditions and fragile skin that can impair wound healing and cause SSSI.

56

57  
58 191 The correlation between a high ASA classification and infection after surgery may be explained due  
59  
60 192 to that the ASA classification encapsulates several other known risk factors (e.g., smoking, DM and

60

1  
2  
3  
4  
5  
6  
7  
8  
9  
10  
11  
12  
13  
14  
15  
16  
17  
18  
19  
20  
21  
22  
23  
24  
25  
26  
27  
28  
29  
30  
31  
32  
33  
34  
35  
36  
37  
38  
39  
40  
41  
42  
43  
44  
45  
46  
47  
48  
49  
50  
51  
52  
53  
54  
55  
56  
57  
58  
59  
60

obesity). These risk factors have been independently associated with a higher risk of surgical site infection resulting from tissue hypoperfusion and subsequent impaired immunological function (12). In our study, obese patients have 1.9 times higher risk to develop SSSI after primary elective arthroplasty. Shohat et al. reported in a study including 19,000 patients that the risk for infection increases with higher BMI levels, though no threshold for PJI was observed (19). Our results are also in line with another large register-based study by Sayed-Noor et al. which observed that the risk of reoperation within 2 to 5 years increased in patients with higher BMI classification (obesity class I-III) (20). The association between BMI and postoperative wound complications may be explained by linked comorbidities such as DM type II (21), prolonged or more complicated arthroplasty surgery (22) and protracted postoperative wound drainage (23). Further, it has been proposed that although overweight and obese patients may not be calorie deficient, they may often be micronutrient and protein deficient (24-27). Thus can, malnutrition paradoxically be associated with increasing BMI. Patients with preoperative malnutrition are shown to have higher rates of comorbidities (congestive heart failure, previous cardiac surgery, hypertension, dyspnea, chronic obstructive pulmonary disease, renal disease requiring dialysis, stroke, diabetes, chronic corticosteroid use, bleeding disorders) (28). Higher rates of surgical site infection after total joint arthroplasty are shown in patients with hypoalbuminemia (29).

It has been described that RA is a risk factor on developing PJI after TJA. A systematic review by Kong et al. presented a significant odds ratio for PJI in RA patients with a THA of 1.75 (95% CI: 1.49 – 2.06) (11) and an odds ratio of 1.34 (95% CI: 1.18 – 1.52) in patients with a TKA. We found that RA had a significant crude RR for the development of SSSI after primary TJA. The risk was 1.7 times higher for RA patients than in patients without RA when adjusting for all covariates and was close to a statistically significance (Table 3). The significance of the association between RA and SSSI may be missed out in this analysis, due to the small number of infections and type II statistical error.

1

## 2 219 *Patient related risk factors for development of deep surgical site infection*

4

5 220 We found that superficial wound complications were associated with the development of PJI in 29%,  
6  
7 221 and high ASA classification was the factor shown to be significant (3.3 times higher than patients  
8  
9 222 with ASA<3) in the progression into PJI. ASA classification is a crude estimate of a patient's medical  
10  
11 223 condition and has been associated with the risk of PJI in numerous previous reports (10, 11). Blanco  
12  
13  
14 224 et al. report a 15-fold odds ratio (95% CI: 6.54–35.80) for PJI in patients with ASA classification  $\geq 3$   
15  
16 225 and another study by Panula et al. presented a hazard ratio of 3.2 (95% CI: 2.0–5.1) for the same ASA  
17  
18 226 classification (30).

20

21 227 In our analysis male sex was close to a significant risk factor for progression from SSSI into PJI both  
22  
23 228 as singular variable and after adjustment for all covariates (2.8 times higher risk for men than women).

25

26 229 A recent meta-analysis showed that male sex was a risk factor for PJI development, especially after  
27  
28 230 total knee arthroplasty (TKA) (18). The link between male sex and PJI may be attributed to some  
29  
30 231 contributing behavioural factors, including smoking, diet, hygiene and alcohol consumption, but the  
31  
32 232 reasons behind this are not clear. Sex-related differences in immune response due to bacteria (e.g.,  
33  
34 233 *Staphylococcus aureus* and *Pseudomonas aeruginosa*) have been reported. In addition, septicaemia  
35  
36  
37 234 and bacteraemia occur more frequently in males than females (21), but whether it will or will not  
38  
39 235 affect the development of SSSI or PJI has yet to be investigated. The absence of statistically  
40  
41 236 significance for male sex as a risk factor of developing PJI after SSSI can depend on the total number  
42  
43  
44 237 of infected patients including in our study.

45

## 46 238 *Prevention of postoperative infection*

47

48 239 The rate of SSSI (7%) and PJI (2%) in this study is consistent with international studies showing  
49  
50  
51 240 levels of SSSI ranging from 1-10% (1, 31) and PJI ranging from 0.2-2.23% (5-7). This work is  
52  
53 241 focused on patient-related factors with a possible effect on the occurrence of SSSI or PJI after elective  
54  
55 242 primary TJA. There are several other factors related to the surgery such as operation time,  
56  
57  
58 243 intraoperative blood loss, number of door openings, discipline in the operating room, antibiotic-  
59  
60 244 prophylaxis used, surgeon's experience, that can affect the overall risk for postoperative infection, but



1  
2  
3 245 those are not included in this current analysis. With the challenging complication of PJI and its major  
4  
5 246 burden on patients (32) and health systems (33), prevention through the implementation of effective  
6  
7 247 strategies is the first and best strategy and should be a priority. Identifying high-risk patients planning  
8  
9 248 to undergo arthroplasty surgery and providing interventions, when possible, by modifying these risk  
10  
11 249 factors, might form the basis of PJI prevention strategies in the future.

### 13 14 250 *Strengths*

15  
16 251 Two major strengths of this study are the large cohort size (n=1191) and the meticulous follow-up of  
17  
18 252 each patient. This thorough postoperative follow-up confirms that the number of recorded incidents  
19  
20 253 of SSSI is accurate, and the follow-up time of 5 years (mean 7.3; range: 5.1-9.2) years is sufficient to  
21  
22 254 reveal any potential cases of PJI. Similar studies have presented larger cohorts but only on registers  
23  
24 255 (32, 34) or shorter follow-ups (1, 2, 34).

25  
26 256 Additionally, our study exclusively includes patients with primary elective joint surgery to minimise  
27  
28 257 the influence of other risk factors concatenated with the initial trauma (hip fractures) or extended  
29  
30 258 impact on the tissue (revision surgery). This inclusion criterion is an additional strength of the study  
31  
32 259 given that the rate of PJI is known to be higher after trauma and revision surgery (35). According to  
33  
34 260 preoperative screening routines in our hospital patients with a history of excessive use of alcohol, IV  
35  
36 261 drug use, poor oral hygiene or other medical conditions or medications that compromise immunity  
37  
38 262 referred to our unit for primary arthroplasty are excluded from surgery or already rehabilitated before  
39  
40 263 surgery.

### 41 42 264 *Limitations*

43  
44 265 A potential limitation is the retrospective nature of our study design. Therefore, there may be  
45  
46 266 inaccuracies or misinterpretations of information received from medical records. However, all  
47  
48 267 patients included in this study were interviewed in person to answer questions about the postoperative  
49  
50 268 period and the information was in that way verified.

51  
52 269 Another limitation is that SSSI is not culture-verified but determined by a consultant orthopaedic  
53  
54 270 surgeon which reflects the clinical reality. Cultures taken at a superficial infection can be misleading

1  
2  
3 271 and classified as contamination, even if a possibility of a clinical significance of skin flora found in  
4  
5 272 cultures recently has been raised (36).

6  
7 273 As in infection-related research in general in which a small number of infections is a major challenge,  
8  
9 274 this study may have failed to detect a link between a potential risk factor and postoperative infection  
10  
11 275 due to a type II error.

## 12 13 14 15 276 **Conclusion**

16  
17 277 In conclusion, this study demonstrates that patients developing SSSI after primary elective hip or  
18  
19 278 knee arthroplasty have a great risk to progress into PJI. Older obese patients with high ASA  
20  
21 279 classification seem to have an increased risk of developing SSSI. A high ASA classification  
22  
23 280 significantly affects the progression from SSSI into PJI.

## 24 25 26 27 281 **Acknowledgement**

28  
29 282 We thank Jakob Viklander for his valuable assistance during the data compilation.

## 30 31 32 283 **Availability of data and materials**

33  
34 284 The dataset generated and analysed during the current study is available from the corresponding  
35  
36 285 author on reasonable request.

## 37 38 39 286 **Competing interests**

40  
41 287 The authors declare that they have no competing interests in this work.

## 42 43 44 288 **Funding**

45  
46 289 This research received no specific grant from any funding agency in the public, commercial or not-  
47  
48 290 for-profit sectors.

## 49 50 51 291 **Authors' contributions**

52  
53 292 Both authors (HE, SL) made substantial contributions to conception and design of the study

54  
55 293 and to acquisition, analysis and interpretation of data. Both authors (HE, SL) have been

56  
57 294 involved in drafting the manuscript and given final approval of the version to be published.

58  
59  
60 295 Both authors (HE, SL) have participated sufficiently in the work to take public responsibility

1  
2  
3 296 for appropriate portions of the content and agreed to be accountable for all aspects of the work  
4  
5 297 in ensuring that questions related to the accuracy or integrity of any part of the work are  
6  
7 298 appropriately investigated and resolved.  
8  
9

## 10 299 **Abbreviations**

11  
12 300 Superficial surgical site infection: SSSI; Periprosthetic joint infection: PJI; Total joint arthroplasty:  
13  
14 301 TJA; Total hip arthroplasty: THA; Total knee arthroplasty: TKA; Body mass index: BMI; American  
15  
16 302 Society of Anaesthesiologists classification: ASA classification; Rheumatologic disease: RA;  
17  
18  
19 303 Diabetes mellitus: DM; Adjusted RR: aRR.  
20

21 304

22  
23  
24 305  
25  
26  
27  
28  
29  
30  
31  
32  
33  
34  
35  
36  
37  
38  
39  
40  
41  
42  
43  
44  
45  
46  
47  
48  
49  
50  
51  
52  
53  
54  
55  
56  
57  
58  
59  
60

1  
2  
3  
4  
5  
6  
7  
8  
9  
10  
11  
12  
13  
14  
15  
16  
17  
18  
19  
20  
21  
22  
23  
24  
25  
26  
27  
28  
29  
30  
31  
32  
33  
34  
35  
36  
37  
38  
39  
40  
41  
42  
43  
44  
45  
46  
47  
48  
49  
50  
51  
52  
53  
54  
55  
56  
57  
58  
59  
60**References**

1. Carroll K, Dowsey M, Choong P, Peel T. Risk factors for superficial wound complications in hip and knee arthroplasty. *Clin Microbiol Infect*. 2014;20(2):130-5.
2. Peersman G, Laskin R, Davis J, Peterson M. Infection in total knee replacement: a retrospective review of 6489 total knee replacements. *Clin Orthop Relat Res*. 2001(392):15-23.
3. Saleh K, Olson M, Resig S, Bershadsky B, Kuskowski M, Gioe T, et al. Predictors of wound infection in hip and knee joint replacement: results from a 20 year surveillance program. *J Orthop Res*. 2002;20(3):506-15.
4. Lima AL, Oliveira PR, Carvalho VC, Saconi ES, Cabrita HB, Rodrigues MB. Periprosthetic Joint Infections. *Interdiscip Perspect Infect Dis*. 2013;2013:542796.
5. Urquhart DM, Hanna FS, Brennan SL, Wluka AE, Leder K, Cameron PA, et al. Incidence and risk factors for deep surgical site infection after primary total hip arthroplasty: a systematic review. *J Arthroplasty*. 2010;25(8):1216-22.e1-3.
6. Ridgeway S, Wilson J, Charlet A, Kafatos G, Pearson A, Coello R. Infection of the surgical site after arthroplasty of the hip. *J Bone Joint Surg Br*. 2005;87(6):844-50.
7. Cooper K, Lamagni T, Harrington P, Wloch C, Hopkins S. Surveillance of surgical site infections in NHS hospitals in England, April 2018 to March 2019. [Available from: [www.gov.uk/phe](http://www.gov.uk/phe).]
8. Pulido L, Ghanem E, Joshi A, Purtill JJ, Parvizi J. Periprosthetic joint infection: the incidence, timing, and predisposing factors. *Clin Orthop Relat Res*. 2008;466(7):1710-5.
9. Jämsen E, Varonen M, Huhtala H, Lehto MU, Lumio J, Konttinen YT, et al. Incidence of prosthetic joint infections after primary knee arthroplasty. *J Arthroplasty*. 2010;25(1):87-92.
10. Dale H, Fenstad AM, Hallan G, Havelin LI, Furnes O, Overgaard S, et al. Increasing risk of prosthetic joint infection after total hip arthroplasty. *Acta Orthop*. 2012;83(5):449-58.
11. Kong L, Cao J, Zhang Y, Ding W, Shen Y. Risk factors for periprosthetic joint infection following primary total hip or knee arthroplasty: a meta-analysis. *Int Wound J*. 2017;14(3):529-36.
12. Kunutsor SK, Whitehouse MR, Blom AW, Beswick AD, Team I. Patient-Related Risk Factors for Periprosthetic Joint Infection after Total Joint Arthroplasty: A Systematic Review and Meta-Analysis. *PLoS One*. 2016;11(3):e0150866.
13. Maoz G, Phillips M, Bosco J, Slover J, Stachel A, Inneh I, et al. The Otto Aufranc Award: Modifiable versus nonmodifiable risk factors for infection after hip arthroplasty. *Clin Orthop Relat Res*. 2015;473(2):453-9.

1  
2  
3  
4  
5  
6  
7  
8  
9  
10  
11  
12  
13  
14  
15  
16  
17  
18  
19  
20  
21  
22  
23  
24  
25  
26  
27  
28  
29  
30  
31  
32  
33  
34  
35  
36  
37  
38  
39  
40  
41  
42  
43  
44  
45  
46  
47  
48  
49  
50  
51  
52  
53  
54  
55  
56  
57  
58  
59  
60

14. Everhart JS, Altneu E, Calhoun JH. Medical comorbidities are independent preoperative risk factors for surgical infection after total joint arthroplasty. *Clin Orthop Relat Res*. 2013;471(10):3112-9.
15. Schrama JC, Espehaug B, Hallan G, Engesaeter LB, Furnes O, Havelin LI, et al. Risk of revision for infection in primary total hip and knee arthroplasty in patients with rheumatoid arthritis compared with osteoarthritis: a prospective, population-based study on 108,786 hip and knee joint arthroplasties from the Norwegian Arthroplasty Register. *Arthritis Care Res (Hoboken)*. 2010;62(4):473-9.
16. Swedish Associatin of Local Authorities and Regions. 2020 [cited 15 May 2020] [Available from: [www.skr.se](http://www.skr.se).]
17. Parvizi J, Tan TL, Goswami K, Higuera C, Della Valle C, Chen AF, et al. The 2018 Definition of Periprosthetic Hip and Knee Infection: An Evidence-Based and Validated Criteria. *J Arthroplasty*. 2018;33(5):1309-14.e2.
18. Resende VAC, Neto AC, Nunes C, Andrade R, Espregueira-Mendes J, Lopes S. Higher age, female gender, osteoarthritis and blood transfusion protect against periprosthetic joint infection in total hip or knee arthroplasties: a systematic review and meta-analysis. *Knee Surg Sports Traumatol Arthrosc*. 2018.
19. Shohat N, Fleischman A, Tarabichi M, Tan TL, Parvizi J. Weighing in on Body Mass Index and Infection After Total Joint Arthroplasty: Is There Evidence for a Body Mass Index Threshold? *Clin Orthop Relat Res*. 2018;476(10):1964-9.
20. Sayed-Noor AS, Mukka S, Mohaddes M, Kärrholm J, Rolfson O. Body mass index is associated with risk of reoperation and revision after primary total hip arthroplasty: a study of the Swedish Hip Arthroplasty Register including 83,146 patients. *Acta Orthop*. 2019;90(3):220-5.
21. McClelland EE, Smith JM. Gender specific differences in the immune response to infection. *Arch Immunol Ther Exp (Warsz)*. 2011;59(3):203-13.
22. Dowsey MM, Choong PF. Obesity is a major risk factor for prosthetic infection after primary hip arthroplasty. *Clin Orthop Relat Res*. 2008;466(1):153-8.
23. Patel VP, Walsh M, Sehgal B, Preston C, DeWal H, Di Cesare PE. Factors associated with prolonged wound drainage after primary total hip and knee arthroplasty. *J Bone Joint Surg Am*. 2007;89(1):33-8.
24. Cross MB, Yi PH, Thomas CF, Garcia J, Della Valle CJ. Evaluation of malnutrition in orthopaedic surgery. *J Am Acad Orthop Surg*. 2014;22(3):193-9.

1

2 370 25. Yayac M, Aggarwal R, Parvizi J. How viable is pre-surgery weight reduction for the  
3 371 reduction of periprosthetic joint infection risk after total joint arthroplasty? *Expert Rev Med*  
4 372 *Devices*. 2020;17(3):149-51.

5 373 26. Nelson CL, Elkassabany NM, Kamath AF, Liu J. Low Albumin Levels, More Than Morbid  
6 374 Obesity, Are Associated With Complications After TKA. *Clin Orthop Relat Res*.  
7 375 2015;473(10):3163-72.

8 376 27. Garcia GH, Fu MC, Dines DM, Craig EV, Gulotta LV. Malnutrition: a marker for increased  
9 377 complications, mortality, and length of stay after total shoulder arthroplasty. *J Shoulder Elbow*  
10 378 *Surg*. 2016;25(2):193-200.

11 379 28. Fu MC, D'Ambrosia C, McLawhorn AS, Schairer WW, Padgett DE, Cross MB.  
12 380 Malnutrition Increases With Obesity and Is a Stronger Independent Risk Factor for Postoperative  
13 381 Complications: A Propensity-Adjusted Analysis of Total Hip Arthroplasty Patients. *J Arthroplasty*.  
14 382 2016;31(11):2415-21.

15 383 29. Bohl DD, Shen MR, Kayupov E, Della Valle CJ. Hypoalbuminemia Independently Predicts  
16 384 Surgical Site Infection, Pneumonia, Length of Stay, and Readmission After Total Joint  
17 385 Arthroplasty. *J Arthroplasty*. 2016;31(1):15-21.

18 386 30. Panula VJ, Alakylä KJ, Venäläinen MS, Haapakoski JJ, Eskelinen AP, Manninen MJ, et al.  
19 387 Risk factors for prosthetic joint infections following total hip arthroplasty based on 33,337 hips in  
20 388 the Finnish Arthroplasty Register from 2014 to 2018. *Acta Orthop*. 2021;92(6):665-72.

21 389 31. Guirro P, Hinarejos P, Pelfort X, Leal-Blanquet J, Torres-Claramunt R, Puig-Verdie L.  
22 390 Long term follow-up of successfully treated superficial wound infections following TKA. *J*  
23 391 *Arthroplasty*. 2015;30(1):101-3.

24 392 32. Jämsen E, Huhtala H, Puolakka T, Moilanen T. Risk factors for infection after knee  
25 393 arthroplasty. A register-based analysis of 43,149 cases. *J Bone Joint Surg Am*. 2009;91(1):38-47.

26 394 33. Kurtz SM, Lau EC, Ong KL, Adler EM, Kolisek FR, Manley MT. Which Clinical and  
27 395 Patient Factors Influence the National Economic Burden of Hospital Readmissions After Total Joint  
28 396 Arthroplasty? *Clin Orthop Relat Res*. 2017.

29 397 34. Almustafa MA, Ewen AM, Deakin AH, Picard F, Clarke JV, Mahmood FF. Risk Factors for  
30 398 Surgical Site Infection Following Lower Limb Arthroplasty: A Retrospective Cohort Analysis of  
31 399 3932 Lower Limb Arthroplasty Procedures in a High Volume Arthroplasty Unit. *J Arthroplasty*.  
32 400 2018;33(6):1861-7.

33 401 35. Kärrholm J, Rogmark C, Naucélér E, Vinblad J, Mohaddes M, Rolfson R. Swedish Hip  
34 402 Arthroplasty Register. Annual report 2018. [Available from: [www.shpr.se](http://www.shpr.se).]

35  
36  
37  
38  
39  
40  
41  
42  
43  
44  
45  
46  
47  
48  
49  
50  
51  
52  
53  
54  
55  
56  
57  
58  
59  
60

1  
2  
3  
4  
5  
6  
7  
8  
9  
10  
11  
12  
13  
14  
15  
16  
17  
18  
19  
20  
21  
22  
23  
24  
25  
26  
27  
28  
29  
30  
31  
32  
33  
34  
35  
36  
37  
38  
39  
40  
41  
42  
43  
44  
45  
46  
47  
48  
49  
50  
51  
52  
53  
54  
55  
56  
57  
58  
59  
60

36. Widerström M, Stegger M, Johansson A, Gurram BK, Larsen AR, Wallinder L, et al. Heterogeneity of *Staphylococcus epidermidis* in prosthetic joint infections: time to reevaluate microbiological criteria? *Eur J Clin Microbiol Infect Dis*. 2022;41(1):87-97.

### Figure legends

Figure 1. Directed acyclic graph for selecting confounders.

The circle with an arrow indicates the exposure; the circles with an (I) illustrate outcomes; and the circles without text indicate confounders used in the statistical model.

Figure 2. Proportion of SSSI and PJI in the total cohort

For peer review only



1  
2  
3  
4  
5  
6  
7  
8  
9  
10  
11  
12  
13  
14  
15  
16  
17  
18  
19  
20  
21  
22  
23  
24  
25  
26  
27  
28  
29  
30  
31  
32  
33  
34  
35  
36  
37  
38  
39  
40  
41  
42  
43  
44  
45  
46  
47  
48  
49  
50  
51  
52  
53  
54  
55  
56  
57  
58  
59  
60

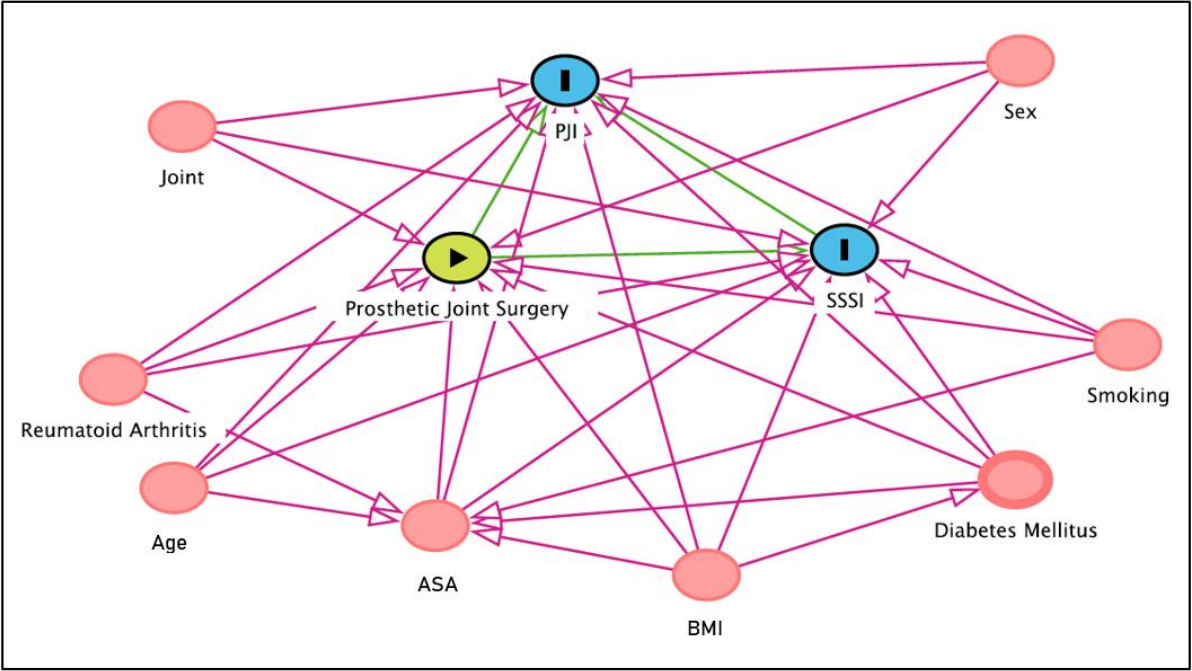

For peer review only



1  
2  
3  
4  
5  
6  
7  
8  
9  
10  
11  
12  
13  
14  
15  
16  
17  
18  
19  
20  
21  
22  
23  
24  
25  
26  
27  
28  
29  
30  
31  
32  
33  
34  
35  
36  
37  
38  
39  
40  
41  
42  
43  
44  
45  
46  
47  
48  
49  
50  
51  
52  
53  
54  
55  
56  
57  
58  
59  
60

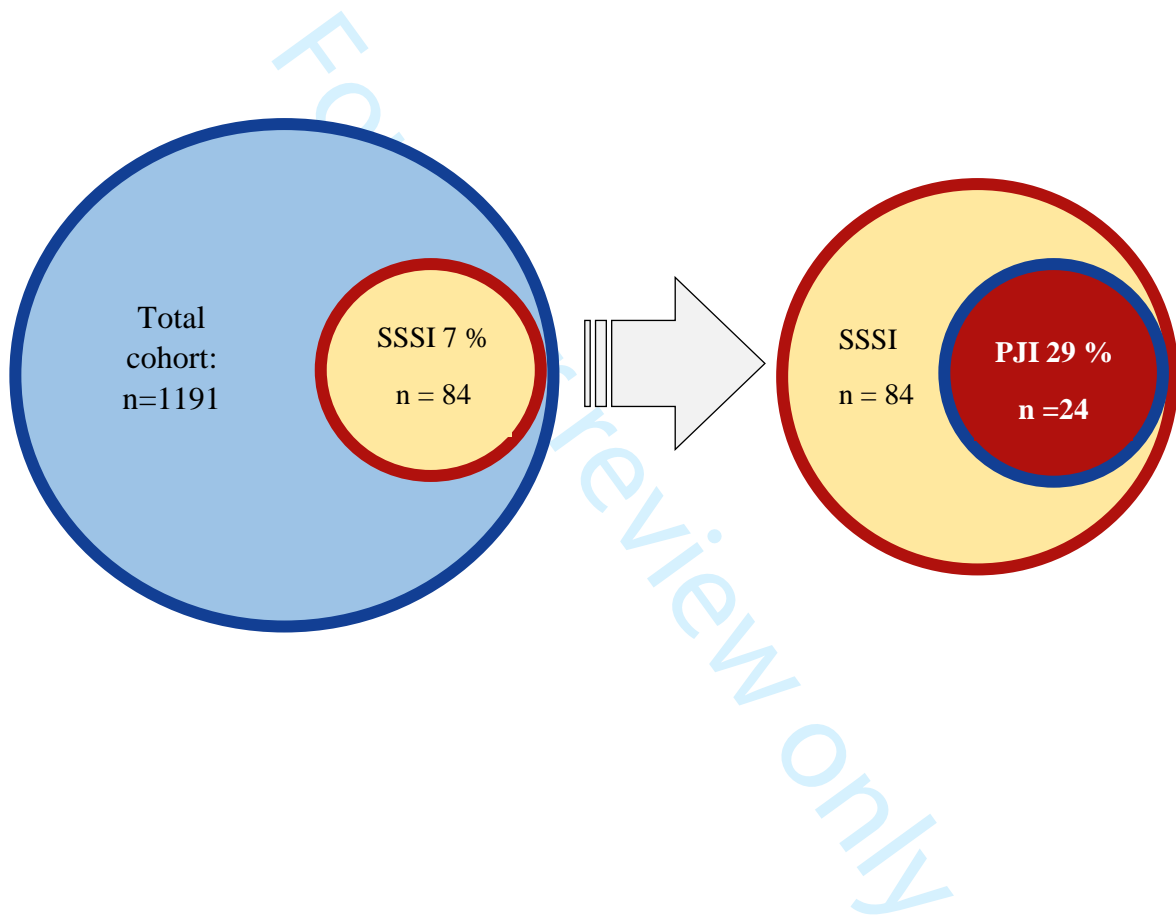

**Supplementary table 1. Risk ratio (RR) for PJI**

|                                |                               |                |                                  |                |
|--------------------------------|-------------------------------|----------------|----------------------------------|----------------|
| <b>SSSI - no PJI</b>           | 1167 (98%)                    |                |                                  |                |
| <b>SSSI - PJI</b>              | 24 (2%)                       |                |                                  |                |
| <b>Variable</b>                | <b>Crude RR<br/>(95 % CI)</b> | <b>P-value</b> | <b>Adjusted RR<br/>(95 % CI)</b> | <b>P-value</b> |
| <b>Joint</b>                   |                               |                |                                  |                |
| <b>Hip</b>                     | ref                           |                | ref                              |                |
| <b>Knee</b>                    | 2.1 (0.9 – 4.7)               | 0.073          | 2.0 (0.8 – 4.8)                  | 0.112          |
| <b>Age</b>                     |                               |                |                                  |                |
| <b>&lt;65</b>                  | ref                           |                | ref                              |                |
| <b>≥65</b>                     | 1.3 (0.6 – 2.9)               | 0.517          | 1.1 (0.5 – 2.7)                  | 0.781          |
| <b>ASA-class<sup>a</sup></b>   |                               |                |                                  |                |
| <b>≤2</b>                      | ref                           |                | ref                              |                |
| <b>≥3</b>                      | 4.8 (2.1 – 10.9)              | <b>0.000</b>   | 3.8 (1.6 – 9.1)                  | <b>0.003</b>   |
| <b>Body Mass Index</b>         |                               |                |                                  |                |
| <b>BMI&lt;25</b>               | ref                           |                | ref                              |                |
| <b>25≤BMI&lt;30</b>            | 2.0 (0.8 – 5.1)               | 0.142          | 1.9 (0.6 – 5.9)                  | 0.271          |
| <b>BMI≥30</b>                  | 1.9 (0.9 – 4.4)               | 0.110          | 1.2 (0.4 – 3.3)                  | 0.772          |
| <b>Sex</b>                     |                               |                |                                  |                |
| <b>Woman</b>                   | ref                           |                | ref                              |                |
| <b>Men</b>                     | 2.1 (0.9 – 4.9)               | 0.075          | 2.8 (1.2 – 6.9)                  | <b>0.022</b>   |
| <b>Smoking<sup>b</sup></b>     |                               |                |                                  |                |
| <b>No</b>                      | ref                           |                | ref                              |                |
| <b>Yes</b>                     | 2.7 (0.4 – 20.0)              | 0.338          | 2.5 (0.3 – 19.0)                 | 0.379          |
| <b>Diabetes</b>                |                               |                |                                  |                |
| <b>No</b>                      | ref                           |                | ref                              |                |
| <b>Yes</b>                     | 2.3 (0.9 – 6.3)               | 0.101          | 1.4 (0.5 – 4.1)                  | 0.543          |
| <b>Rheumatological disease</b> |                               |                |                                  |                |
| <b>No</b>                      | ref                           |                | ref                              |                |
| <b>Yes</b>                     | 2.0 (0.8 -5.5)                | 0.166          | 1.8 (0.6 – 5.2)                  | 0.294          |

ASA (American Society of Anaesthesiologists), BMI (Body mass index).

<sup>a</sup>missing data in 17 cases

<sup>b</sup>missing data in 5 cases

**STROBE 2007 (v4) Statement—Checklist of items that should be included in reports of *cross-sectional studies***

| Section/Topic                | Item # | Recommendation                                                                                                                                                                       | Reported on page # |
|------------------------------|--------|--------------------------------------------------------------------------------------------------------------------------------------------------------------------------------------|--------------------|
| <b>Title and abstract</b>    | 1      | (a) Indicate the study's design with a commonly used term in the title or the abstract                                                                                               | 1                  |
|                              |        | (b) Provide in the abstract an informative and balanced summary of what was done and what was found                                                                                  | 2                  |
| <b>Introduction</b>          |        |                                                                                                                                                                                      |                    |
| Background/rationale         | 2      | Explain the scientific background and rationale for the investigation being reported                                                                                                 | 3                  |
| Objectives                   | 3      | State specific objectives, including any prespecified hypotheses                                                                                                                     | 3                  |
| <b>Methods</b>               |        |                                                                                                                                                                                      |                    |
| Study design                 | 4      | Present key elements of study design early in the paper                                                                                                                              | 4                  |
| Setting                      | 5      | Describe the setting, locations, and relevant dates, including periods of recruitment, exposure, follow-up, and data collection                                                      | 4                  |
| Participants                 | 6      | (a) Give the eligibility criteria, and the sources and methods of selection of participants                                                                                          | 5                  |
| Variables                    | 7      | Clearly define all outcomes, exposures, predictors, potential confounders, and effect modifiers. Give diagnostic criteria, if applicable                                             | 5                  |
| Data sources/<br>measurement | 8*     | For each variable of interest, give sources of data and details of methods of assessment (measurement). Describe comparability of assessment methods if there is more than one group | 5                  |
| Bias                         | 9      | Describe any efforts to address potential sources of bias                                                                                                                            | na                 |
| Study size                   | 10     | Explain how the study size was arrived at                                                                                                                                            | 5                  |
| Quantitative variables       | 11     | Explain how quantitative variables were handled in the analyses. If applicable, describe which groupings were chosen and why                                                         | na                 |
| Statistical methods          | 12     | (a) Describe all statistical methods, including those used to control for confounding                                                                                                | 5                  |
|                              |        | (b) Describe any methods used to examine subgroups and interactions                                                                                                                  | 5                  |
|                              |        | (c) Explain how missing data were addressed                                                                                                                                          | 5                  |
|                              |        | (d) If applicable, describe analytical methods taking account of sampling strategy                                                                                                   | na                 |
|                              |        | (e) Describe any sensitivity analyses                                                                                                                                                | na                 |
| <b>Results</b>               |        |                                                                                                                                                                                      |                    |

|                          |     |                                                                                                                                                                                                                                                                                                                                                                                                               |              |
|--------------------------|-----|---------------------------------------------------------------------------------------------------------------------------------------------------------------------------------------------------------------------------------------------------------------------------------------------------------------------------------------------------------------------------------------------------------------|--------------|
| Participants             | 13* | (a) Report numbers of individuals at each stage of study—eg numbers potentially eligible, examined for eligibility, confirmed eligible, included in the study, completing follow-up, and analysed<br>(b) Give reasons for non-participation at each stage<br>(c) Consider use of a flow diagram                                                                                                               | 6            |
| Descriptive data         | 14* | (a) Give characteristics of study participants (eg demographic, clinical, social) and information on exposures and potential confounders<br>(b) Indicate number of participants with missing data for each variable of interest                                                                                                                                                                               | 6            |
| Outcome data             | 15* | Report numbers of outcome events or summary measures                                                                                                                                                                                                                                                                                                                                                          | 7            |
| Main results             | 16  | (a) Give unadjusted estimates and, if applicable, confounder-adjusted estimates and their precision (eg, 95% confidence interval). Make clear which confounders were adjusted for and why they were included<br>(b) Report category boundaries when continuous variables were categorized<br>(c) If relevant, consider translating estimates of relative risk into absolute risk for a meaningful time period | 8<br>5<br>na |
| Other analyses           | 17  | Report other analyses done—eg analyses of subgroups and interactions, and sensitivity analyses                                                                                                                                                                                                                                                                                                                | 10           |
| <b>Discussion</b>        |     |                                                                                                                                                                                                                                                                                                                                                                                                               |              |
| Key results              | 18  | Summarise key results with reference to study objectives                                                                                                                                                                                                                                                                                                                                                      | 11           |
| Limitations              | 19  | Discuss limitations of the study, taking into account sources of potential bias or imprecision. Discuss both direction and magnitude of any potential bias                                                                                                                                                                                                                                                    | 12           |
| Interpretation           | 20  | Give a cautious overall interpretation of results considering objectives, limitations, multiplicity of analyses, results from similar studies, and other relevant evidence                                                                                                                                                                                                                                    | 11           |
| Generalisability         | 21  | Discuss the generalisability (external validity) of the study results                                                                                                                                                                                                                                                                                                                                         | 12           |
| <b>Other information</b> |     |                                                                                                                                                                                                                                                                                                                                                                                                               |              |
| Funding                  | 22  | Give the source of funding and the role of the funders for the present study and, if applicable, for the original study on which the present article is based                                                                                                                                                                                                                                                 | 13           |

\*Give information separately for cases and controls in case-control studies and, if applicable, for exposed and unexposed groups in cohort and cross-sectional studies.

**Note:** An Explanation and Elaboration article discusses each checklist item and gives methodological background and published examples of transparent reporting. The STROBE checklist is best used in conjunction with this article (freely available on the Web sites of PLoS Medicine at <http://www.plosmedicine.org/>, Annals of Internal Medicine at <http://www.annals.org/>, and Epidemiology at <http://www.epidem.com/>). Information on the STROBE Initiative is available at [www.strobe-statement.org](http://www.strobe-statement.org).

# BMJ Open

## Patient-related factors associated with superficial surgical site infection and progression to a periprosthetic joint infection after elective primary total joint arthroplasty: a single-centre, retrospective study in Sweden

|                                 |                                                                                                                                                                                                                                             |
|---------------------------------|---------------------------------------------------------------------------------------------------------------------------------------------------------------------------------------------------------------------------------------------|
| Journal:                        | <i>BMJ Open</i>                                                                                                                                                                                                                             |
| Manuscript ID                   | bmjopen-2022-060754.R2                                                                                                                                                                                                                      |
| Article Type:                   | Original research                                                                                                                                                                                                                           |
| Date Submitted by the Author:   | 05-Jul-2022                                                                                                                                                                                                                                 |
| Complete List of Authors:       | Eriksson, Hannah; Uppsala University Department of Surgical Sciences, Department of Surgical Sciences/Orthopaedics<br>Lazarinis, Stergios; Uppsala University Department of Surgical Sciences, Department of Surgical Sciences/Orthopaedics |
| <b>Primary Subject Heading</b>: | Infectious diseases                                                                                                                                                                                                                         |
| Secondary Subject Heading:      | Infectious diseases                                                                                                                                                                                                                         |
| Keywords:                       | Musculoskeletal disorders < ORTHOPAEDIC & TRAUMA SURGERY, Adult orthopaedics < ORTHOPAEDIC & TRAUMA SURGERY, Hip < ORTHOPAEDIC & TRAUMA SURGERY, Knee < ORTHOPAEDIC & TRAUMA SURGERY                                                        |
|                                 |                                                                                                                                                                                                                                             |

SCHOLARONE™  
Manuscripts

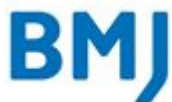

I, the Submitting Author has the right to grant and does grant on behalf of all authors of the Work (as defined in the below author licence), an exclusive licence and/or a non-exclusive licence for contributions from authors who are: i) UK Crown employees; ii) where BMJ has agreed a CC-BY licence shall apply, and/or iii) in accordance with the terms applicable for US Federal Government officers or employees acting as part of their official duties; on a worldwide, perpetual, irrevocable, royalty-free basis to BMJ Publishing Group Ltd ("BMJ") its licensees and where the relevant Journal is co-owned by BMJ to the co-owners of the Journal, to publish the Work in this journal and any other BMJ products and to exploit all rights, as set out in our [licence](#).

The Submitting Author accepts and understands that any supply made under these terms is made by BMJ to the Submitting Author unless you are acting as an employee on behalf of your employer or a postgraduate student of an affiliated institution which is paying any applicable article publishing charge ("APC") for Open Access articles. Where the Submitting Author wishes to make the Work available on an Open Access basis (and intends to pay the relevant APC), the terms of reuse of such Open Access shall be governed by a Creative Commons licence – details of these licences and which [Creative Commons](#) licence will apply to this Work are set out in our licence referred to above.

Other than as permitted in any relevant BMJ Author's Self Archiving Policies, I confirm this Work has not been accepted for publication elsewhere, is not being considered for publication elsewhere and does not duplicate material already published. I confirm all authors consent to publication of this Work and authorise the granting of this licence.

1  
2  
3 1 **Patient-related factors associated with superficial surgical site**  
4  
5 2 **infection and progression to a periprosthetic joint infection after**  
6  
7 3 **elective primary total joint arthroplasty: a single-centre, retrospective**  
8  
9 **study in Sweden**  
10 4  
11  
12 5

13  
14 6 Running title: Patient-related factors associated with superficial surgical site infection and the  
15 7 progression to a periprosthetic joint infection after elective primary total joint arthroplasty  
16 8

17 8  
18  
19 9 Hannah K Eriksson MD, [hannah.eriksson@surgsci.uu.se](mailto:hannah.eriksson@surgsci.uu.se)

20  
21 10 Stergios Lazarinis MD, PhD, [lazarinis.stergios@surgsci.uu.se](mailto:lazarinis.stergios@surgsci.uu.se)  
22

23 11  
24 12 Department of Surgical Sciences/Orthopaedics, Uppsala University Hospital, Uppsala,  
25 13 Sweden.  
26 13  
27  
28 14  
29 15  
30 16  
31 17  
32 18  
33 19  
34 20  
35 21  
36 22  
37 23  
38 24  
39 25  
40 26  
41 27

40 21 **Correspondence to:**

41 22 H.K Eriksson

42 23 Department of Surgical Sciences/Orthopaedics

43 24 Uppsala University Hospital

44 25 SE-751 85 Uppsala, Sweden

45 26 Email: [hannah.eriksson@surgsci.uu.se](mailto:hannah.eriksson@surgsci.uu.se)  
46 27  
47  
48  
49  
50  
51  
52  
53  
54  
55  
56  
57  
58  
59  
60

1  
2  
3 28 **Abstract**

4  
5 29 **Objectives:** Superficial surgical site infection (SSSI) may increase the risk of serious complications  
6  
7 30 such as periprosthetic joint infection (PJI). This study aims to identify patient-related risk factors  
8  
9 31 associated with SSSI and investigate their correlation with the progression of PJI.

10 32 **Design:** In this retrospective study 1,191 elective hip and knee prostheses were included. Patients  
11  
12 33 were interviewed 3-5 months after surgery to answer questions about the postoperative period. Patient  
13  
14 34 records were reviewed to determine whether there had been any documentation of wound-healing  
15  
16 35 difficulties or whether antibiotics were prescribed to treat an infection related to arthroplasty surgery.

17 36 **Setting:** Uppsala University Hospital, patients treated between November 2008 to December 2012.

18 37 **Participants:** The study population comprised 433 knees and 758 hips.

19 38 **Outcome measures:** We studied patient-related risk factors (joint, age, sex, the American Society of  
20  
21 39 Anesthesiologists (ASA) classification, body mass index (BMI), smoking, diabetes and rheumatic  
22  
23 40 disease) to determine whether they were associated with 1) SSSI and 2) the progress from SSSI to  
24  
25 41 PJI.

26 42 **Results:** 84 (7%) patients of the total cohort developed SSSI. This infection progressed to a PJI in 24  
27  
28 43 (29%) of the patients. Factors with increased adjusted risk ratios (aRRs) for SSSIs were knee surgery  
29  
30 44 (1.7; 95% confidence interval, CI: 1.1 – 2.7), age  $\geq 65$  years (1.7; 95% CI: 1.1 – 2.8), BMI  $\geq 30$  (1.9;  
31  
32 45 95% CI: 1.0 – 3.4) and ASA classification  $\geq 3$  (1.7; 95% CI: 1.0 – 2.9). ASA classification  $\geq 3$  was the  
33  
34 46 only factor showing a significant progression from SSSI to PJI (aRR=3.3; 95% CI: 1.0 – 10.3).

35 47 **Conclusions:** The risk of progressing from a SSSI to a PJI is high. Older patients, patients with  
36  
37 48 obesity, and those with a high ASA classification considered for elective total knee arthroplasty seem  
38  
39 49 to have an increased risk of developing SSSI. Patients with a high ASA classification seem to have  
40  
41 50 an increased risk of progressing from SSSI to PJI.

42 51



## 52 **Strengths and limitations of this study**

- 53 • Strengths of this study include the large cohort size (n=1,191) and careful follow-up of each  
54 patient.
- 55 • Exclusive inclusion of patients with primary elective arthroplasty surgery on the hip or knee.
- 56 • Limitations of this study include the retrospective study design and the small number of  
57 infections, leading to a potential risk of a type II error.

## 58 **Keywords**

59 Periprosthetic joint infection (PJI), superficial surgical site infection (SSSI), total joint arthroplasty  
60 (TJA), risk factors.

## 61 **Introduction**

62 Infection after total joint arthroplasty (TJA) can be defined as either superficial involving skin or  
63 subcutaneous tissue only (a superficial surgical site infection, SSSI) or deep (periprosthetic joint  
64 infection, PJI) with deep soft tissue involvement (e.g., fascial and muscle layers) and the prosthesis.  
65 The incidence of SSSI after TJA can vary from 1 to 10% (1, 2, 3) and may increase the risk of  
66 subsequent PJI by 35-fold (3). The frequency of PJI ranges between 1 and 5% (4-7). Patient-related  
67 risk factors, such as obesity, rheumatoid arthritis (RA), smoking, male sex, age, alcohol abuse,  
68 American Society of Anesthesiologists (ASA) classification >2 and diabetes mellitus (DM) (8-16),  
69 have been described as risk factors for PJI but not confirmed as risk factors for SSSI. In clinical  
70 practice priority should be to identify high-risk patients for SSSI and PJI, aiming for optimal patient  
71 outcomes and the opportunity to manage modifiable risk factors. It is essential to seize any possibility  
72 to optimise all prerequisites for the best achievable surgical outcome. Thus, we sought to 1) determine  
73 which patient-related factors are linked to SSSI and 2) investigate the progression from SSSI to PJI.

## 74 **Methods**

### 75 *Study design*

76 This retrospective study of primary elective prostheses in hip or knee joints included patients in a  
77 national project designed to reduce the incidence of hospital-related infections (17). The study  
78 patients were treated at Uppsala University Hospital from November 2008 to December 2012 and  
79 interviewed 3-5 months after surgery to answer questions about the postoperative period. Patient  
80 medical records were reviewed to determine whether there had been any documentation of difficulties  
81 with wound healing or whether antibiotics were prescribed to treat an infection related to hip or knee  
82 arthroplasty. An orthopaedic consultant reviewed all information from patient records (recorded from  
83 general practitioners or orthopaedic consultants), including possible wound healing complications or  
84 antibiotic prescriptions due to suspected postoperative infection. This information and the results of  
85 the patient interview were used to determine the occurrence of SSSI. The diagnosis of PJI was made  
86 by a consultant orthopaedic surgeon in consultation with a consultant in infectious diseases. In a  
87 retrospective review of patient records selected patients met the criteria for PJI (18), but those criteria  
88 were not used at the time of diagnosis. Patient records were reviewed for patient-related risk factors,  
89 and a local arthroplasty register was used to obtain information about revision surgery that had been  
90 necessary due to persistent PJI. This study was limited to patient-related risk factors associated with  
91 the development of SSSI and focused on factors that may be avoidable or preoperatively optimised.  
92 Consent for publication was considered in the application to the Human Research Ethics  
93 Committee. Because this was a retrospective study, no consent (written or verbal) was needed for this  
94 work. The study design was reviewed and approved by the Human Research Ethics Committee (Dnr:  
95 2019-01425).

### 97 *Study population*

98 The study population comprised 664 men, 527 women and the study material included 1,191 joints  
99 (433 knees, 758 hips). Hip prostheses were cemented, cementless or hybrids. Only cemented

1  
2 100 components were used in all knees. In all cemented prostheses antibiotic-loaded cement with  
3  
4  
5 101 gentamycin was applied. All patients received systemic pre- and perioperative antibiotic prophylaxis  
6  
7 102 in accordance with national guidelines (cloxacillin, and in the case of penicillin allergy, clindamycin).  
8

### 9 103 *Confounders*

10  
11 104 Patient-related factors (e.g., joint, sex, age, body mass index (BMI), RA, ASA classification,  
12  
13  
14 105 smoking, DM) were considered clinically relevant for the association between arthroplasty and SSSI  
15  
16 106 or PJI. These specific patient-related variables have previously been linked to exposure and outcome  
17  
18 107 and are not considered in the causal pathway between potential risk factors and outcome (Figure 1).  
19  
20  
21 108 Relevant confounders were analysed as categorical variables: ASA classification (<3 or ≥3), age (<65  
22  
23 109 years or ≥65 years) and DM (patients with DM included both type 1 and 2, drug- or diet-related). For  
24  
25 110 BMI, the WHO (World Health Organisation) classification was used and divided into the following  
26  
27  
28 111 groups: BMI <25 (under and normal weight), 25 ≤BMI<30 (overweight) and BMI ≥30 (obesity class  
29  
30 112 I-III).

### 31 32 113 *Statistics*

33  
34  
35 114 Descriptive statistics were used to summarise and report demographic characteristics.

36  
37 115 In an initial analysis logistic regression was performed, entering covariates as single variables. Crude  
38  
39 116 risk ratios (RRs) for SSSI and PJI were calculated for each variable with 95% confidence intervals  
40  
41  
42 117 (95% CIs). The covariates were entered into the regression model in the next step, with RRs mutually  
43  
44 118 adjusted for all covariates. An adjusted RR (aRR) for each covariate was calculated for the occurrence  
45  
46 119 of SSSI or PJI and any progression of SSSI to PJI.

47  
48 120 All statistical analyses were performed using SPSS (version 26.0) and p-values ≤0.05 were  
49  
50  
51 121 considered significant.

### 52 53 122 *Patient and public involvement*

54  
55 123 Patients or the public were not involved in developing the research questions, outcome measures, the  
56  
57  
58 124 design, conduct, reporting or dissemination plans of our research. The results of this study will not  
59  
60 125 be distributed separately to study participants.

1  
2  
3 126  
4  
5  
6 127  
7  
8 128  
9  
10 129  
11  
12  
13 130  
14  
15 131  
16  
17  
18  
19  
20  
21  
22  
23  
24  
25 132  
26 133  
27  
28 134  
29 135

## Results

The number of surgeries for prosthetic hip or knee joints was 1,191. 84 joints (7%) developed an SSSI and 24 (2%) a PJI. Of the 84 joints with SSSI, 24 (29%) progressed to a PJI (Figure 2).

In the hip cohort (758) 40 joints (5%) developed an SSSI and 11 (2%) a PJI. In the knee cohort (433) 44 joints (10%) developed an SSSI and 13 (3%) a PJI (Table 1).

**Table 1. Number of postoperative infections**

| Variable                    | SSSI       | PJI       |
|-----------------------------|------------|-----------|
| <b>Total cohort (1,191)</b> | 84 (7.1%)  | 24 (2.0%) |
| <b>Hip (758)</b>            | 40 (5.3%)  | 11 (1.5%) |
| <b>Knee (433)</b>           | 44 (10.4%) | 13 (3.1%) |

SSSI (superficial surgical site infection), PJI (periprosthetic joint infection).

Demographic characteristics of the cohorts are outlined in Table 2.

**Table 2. Cohort demographic characteristics**

| Variable                       | Total cohort<br>n = 1,191 | Hip<br>n = 758 (64%) | Knee<br>n = 433 (36%) | Range |
|--------------------------------|---------------------------|----------------------|-----------------------|-------|
| <b>Mean age (year)</b>         | 63                        | 61                   | 65                    | 18–96 |
| <b>Age</b>                     |                           |                      |                       |       |
| <65                            | 673 (56%)                 | 447 (59%)            | 226 (52%)             |       |
| ≥65                            | 518 (44%)                 | 331 (41%)            | 207 (48%)             |       |
| <b>ASA-class</b>               |                           |                      |                       |       |
| ≤2                             | 964 (81%)                 | 631 (84%)            | 333 (78%)             |       |
| ≥3                             | 210 (18%)                 | 117 (16%)            | 93 (22%)              |       |
| <b>Mean BMI</b>                | 28                        | 27                   | 29                    | 14–51 |
| <b>BMI</b>                     |                           |                      |                       |       |
| BMI <25 <sup>b</sup>           | 356 (30%)                 | 259 (34%)            | 97 (22%)              |       |
| 25≤BMI<30                      | 474 (40%)                 | 307 (41%)            | 167 (39%)             |       |
| BMI ≥30                        | 361 (30%)                 | 192 (25%)            | 169 (39%)             |       |
| <b>Sex</b>                     |                           |                      |                       |       |
| Women                          | 664 (56%)                 | 387 (51%)            | 277 (64%)             |       |
| Men                            | 527 (44%)                 | 371 (49%)            | 156 (36%)             |       |
| <b>Smoking<sup>c</sup></b>     |                           |                      |                       |       |
| No                             | 1064 (90%)                | 673 (89%)            | 391 (90%)             |       |
| Yes                            | 122 (10%)                 | 81 (11%)             | 41 (10%)              |       |
| <b>Diabetes</b>                |                           |                      |                       |       |
| No                             | 1067 (90%)                | 686 (91%)            | 381 (88%)             |       |
| Yes                            | 124 (10%)                 | 72 (9%)              | 52 (12%)              |       |
| <b>Rheumatological disease</b> |                           |                      |                       |       |
| No                             | 1052 (88%)                | 690 (91%)            | 362 (84%)             |       |

|            |           |         |          |
|------------|-----------|---------|----------|
| <b>Yes</b> | 139 (12%) | 68 (9%) | 71 (16%) |
|------------|-----------|---------|----------|

ASA (American Society of Anesthesiologists), BMI (body mass index).

<sup>a</sup> missing data in 17 cases

<sup>b</sup> underweight 17 cases (BMI <18.5)

<sup>c</sup> missing data in 5 cases

### Risk factors for SSSI

Risk factors with a significant crude RR for developing SSSI were knee surgery (RR=2.0; 95% CI: 1.3 – 3.2), age  $\geq 65$  years (RR=1.8; 95% CI: 1.2 – 2.8), ASA classification  $\geq 3$  (RR=2.4; 95% CI: 1.5 – 3.8) and rheumatic disease (RR=1.9; 95% CI: 1.1 – 3.3). Adjusting for all covariates, factors with significant aRRs for SSSI were knee surgery (aRR=1.7; 95% CI 1.1 – 2.7), age  $\geq 65$  years (aRR=1.7; 95% CI: 1.1 – 2.8), ASA classification  $\geq 3$  (aRR=1.7; 95% CI: 1.0 – 2.9) and BMI  $\geq 30$  (aRR=1.9; 95% CI: 1.0 – 3.4) (Table 3).

**Table 3. Risk ratio (RR) for SSSI**

| Variable                       | Crude RR<br>(95 % CI) | P-value      | Adjusted RR<br>(95 % CI) | P-value      |
|--------------------------------|-----------------------|--------------|--------------------------|--------------|
| <b>No SSSI</b> 1107 (9%)       |                       |              |                          |              |
| <b>SSSI</b> 84 (7%)            |                       |              |                          |              |
| <b>Joint</b>                   |                       |              |                          |              |
| Hip                            | ref                   |              | ref                      |              |
| Knee                           | 2.0 (1.3 – 3.2)       | <b>0.002</b> | 1.7 (1.1 – 2.7)          | <b>0.022</b> |
| <b>Age</b>                     |                       |              |                          |              |
| <65                            | ref                   |              | ref                      |              |
| $\geq 65$                      | 1.8 (1.2 – 2.8)       | <b>0.010</b> | 1.7 (1.1 – 2.8)          | <b>0.024</b> |
| <b>ASA class<sup>a</sup></b>   |                       |              |                          |              |
| $\leq 2$                       | ref                   |              | ref                      |              |
| $\geq 3$                       | 2.4 (1.5 – 3.8)       | <b>0.001</b> | 1.7 (1.0 – 2.9)          | <b>0.038</b> |
| <b>BMI</b>                     |                       |              |                          |              |
| BMI <25                        | ref                   |              | ref                      |              |
| 25 $\leq$ BMI <30              | 1.4 (0.8 – 2.2)       | 0.211        | 1.1 (0.6 – 2.0)          | 0.780        |
| BMI $\geq 30$                  | 2.3 (0.9 – 5.5)       | 0.075        | 1.9 (1.0 – 3.4)          | <b>0.045</b> |
| <b>Sex</b>                     |                       |              |                          |              |
| Women                          | ref                   |              | ref                      |              |
| Men                            | 1.1 (0.7 – 1.7)       | 0.677        | 1.1 (0.8 – 2.1)          | 0.298        |
| <b>Smoking<sup>b</sup></b>     |                       |              |                          |              |
| No                             | ref                   |              | ref                      |              |
| Yes                            | 1.1 (0.5 – 2.3)       | 0.811        | 1.1 (0.5 – 2.3)          | 0.841        |
| <b>Diabetes</b>                |                       |              |                          |              |
| No                             | ref                   |              | ref                      |              |
| Yes                            | 1.6 (0.9 – 3.1)       | 0.118        | 1.1 (0.6 – 2.2)          | 0.753        |
| <b>Rheumatological disease</b> |                       |              |                          |              |
| No                             | ref                   |              | ref                      |              |
| Yes                            | 1.9 (1.1 – 3.3)       | <b>0.031</b> | 1.7 (0.9 – 3.1)          | 0.089        |

ASA (American Society of Anesthesiologists), BMI (body mass index).

<sup>a</sup> missing data in 17 cases

<sup>b</sup> missing data in 5 cases

1  
2 152 *Risk factors for PJI*

3  
4  
5 153 The only risk factor with a significant crude RR for the development of PJI was ASA classification  
6  
7 154  $\geq 3$  (RR=4.8; 95% CI: 2.1 – 10.9). Factors with significant aRRs for PJI were ASA classification  $\geq 3$   
8  
9 155 (aRR=3.8; 95% CI: 1.6 – 9.1) and male sex (aRR=2.8; 95% CI: 1.2 – 6.9) (Supplementary Table 1).

10  
11  
12 156 *Risk factors for PJI in patients with SSSI*

13  
14 157 The only risk factor with a significant crude RR for the development of PJI in the SSSI group was  
15  
16 158 ASA classification  $\geq 3$  (RR=3.0; 95% CI: 1.1 – 8.1). The aRR shown for ASA classification was 3.3  
17  
18 159 (95% CI: 1.0 – 10.3) (Table 4).

19  
20  
21 **Table 4. Risk ratio (RR) for PJI in patients with SSSI**

| Variable                            | Crude RR<br>(95 % CI) | P-value      | Adjusted RR<br>(95 % CI) | P-value      |
|-------------------------------------|-----------------------|--------------|--------------------------|--------------|
| <b>SSSI – no progression to PJI</b> |                       |              |                          |              |
|                                     | 60 (71%)              |              |                          |              |
| <b>SSSI – progression to PJI</b>    |                       |              |                          |              |
|                                     | 24 (29%)              |              |                          |              |
| <b>Joint</b>                        |                       |              |                          |              |
| Hip                                 | ref                   |              | ref                      |              |
| Knee                                | 1.1 (0.4 – 2.9)       | 0.836        | 1.3 (0.4 – 3.6)          | 0.663        |
| <b>Age</b>                          |                       |              |                          |              |
| <65                                 | ref                   |              | ref                      |              |
| $\geq 65$                           | 1.5 (0.6 – 3.9)       | 0.404        | 2.0 (0.7 – 6.2)          | 0.212        |
| <b>ASA class</b>                    |                       |              |                          |              |
| $\leq 2$                            | ref                   |              | ref                      |              |
| $\geq 3$                            | 3.0 (1.1 – 8.1)       | <b>0.030</b> | 3.3 (1.0 – 10.3)         | <b>0.044</b> |
| <b>BMI</b>                          |                       |              |                          |              |
| BMI <25                             | ref                   |              | ref                      |              |
| 25 $\leq$ BMI <30                   | 1.7 (0.6 – 5.0)       | 0.309        | 2.3 (0.5 – 9.6)          | 0.264        |
| BMI $\geq 30$                       | 1.2 (0.5 – 3.1)       | 0.728        | 1.8 (0.5 – 7.1)          | 0.411        |
| <b>Sex</b>                          |                       |              |                          |              |
| Women                               | ref                   |              | ref                      |              |
| Men                                 | 2.5 (0.9 – 6.6)       | 0.065        | 2.8 (0.9 – 8.3)          | 0.064        |
| <b>Smoking</b>                      |                       |              |                          |              |
| No                                  | ref                   |              | ref                      |              |
| Yes                                 | 4.9 (0.5 – 51.1)      | 0.188        | 5.3 (0.5 – 54.4)         | 0.160        |
| <b>Diabetes</b>                     |                       |              |                          |              |
| No                                  | ref                   |              | ref                      |              |
| Yes                                 | 0.6 (0.2 – 2.0)       | 0.394        | 1.3 (0.3 – 5.7)          | 0.774        |
| <b>Rheumatological disease</b>      |                       |              |                          |              |
| No                                  | ref                   |              | ref                      |              |
| Yes                                 | 1.2 (0.4 – 3.8)       | 0.792        | 1.1 (0.3 – 4.7)          | 0.883        |

22  
23  
24  
25  
26  
27  
28  
29  
30  
31  
32  
33  
34  
35  
36  
37  
38  
39  
40  
41  
42  
43  
44  
45  
46  
47  
48  
49  
50  
51  
52  
53  
54  
55  
56  
57 160 ASA (American Society of Anesthesiologists), BMI (body mass index).

58  
59 161  
60

## 162 Discussion

163 Identifying, mitigating and optimising risk factors for SSSI and PJI is a desirable approach to prevent  
164 this devastating complication. The results of our study are relevant and provide new insight into the  
165 relationship between patient-related risk factors for SSSI and their association with the risk of PJI  
166 development. The risk and consequences of PJI after TJA have been described elsewhere (2, 5, 12).  
167 It has been reported that the occurrence of SSSI increases the risk of PJI by up to 35 times (3).  
168 However, factors affecting the progression from SSSI to PJI have not been investigated. Identifying  
169 and optimising risk factors for SSSI may decrease the risk of PJI.

### 170 *Patient-related risk factors for superficial surgical site infection*

171 This study shows that knee surgery, age >65 years, a high ASA classification ( $\geq 3$ ) and obesity (BMI  
172 >30) are independent risk factors for developing SSSI after elective primary joint arthroplasty.

173 Knee surgery seems to be a risk factor for developing SSSI after elective primary arthroplasty. Studies  
174 have shown that patients with knee prostheses have a higher risk of PJI and are in greater need of  
175 revision surgery than patients with hip prostheses (6, 9, 12, 19). Because there is less soft tissue  
176 around the knee than around the hip, meaning a shorter distance between skin and joint, the risk of  
177 superficial infection is also increased. Blood circulation around the knee area is more exposed to  
178 impact than the hip area and perfusion is more easily disturbed. Increased tourniquet time has been  
179 identified as an individual risk factor for deep infection, impaired wound healing and prolonged  
180 wound discharge after total knee arthroplasty (TKA) (1). However, due to a lack of data, this analysis  
181 could not be included in this study.

182 Our finding that age is a significant risk factor for SSSI is congruent with the results from a large  
183 (n=1,000) retrospective study (1). Older patients ( $\geq 65$  years) may have pre-existing medical  
184 conditions and fragile skin that could impair wound healing, making them more susceptible to SSSI.

185 The correlation between a high ASA score and infection after surgery can be explained because the  
186 ASA classification encapsulates several other known risk factors (e.g., smoking, DM, obesity). These



1

2 187 risk factors have been independently associated with a higher risk of surgical site infection due to  
3  
4  
5 188 tissue hypoperfusion and subsequent impaired immunological function (13).

6

7 189 Our obese patients have a 1.9 times higher risk of SSSI after primary elective arthroplasty. Shohat et

8

9 190 al. reported in a study including 19,000 patients that the risk for infection increases with higher BMI

10

11 191 levels, although no BMI threshold was observed (20). Our results align with another large register-

12

13  
14 192 based study that reported an increased risk of reoperation in patients with higher BMI classification

15

16 193 (obesity class I-III) (21). The association between BMI and postoperative wound complications may

17

18 194 be explained by linked comorbidities (e.g., DM type II) (22), prolonged or more complicated

19

20 195 arthroplasty surgery (23) and protracted postoperative wound drainage (24). It has also been

21

22 196 suggested that, although overweight and obese patients may not be calorie deficient, they are often

23

24 197 micronutrient and protein deficient (25-28). Thus, malnutrition can be linked to increased BMI.

25

26 198 Patients with preoperative malnutrition have higher rates of comorbidities (congestive heart failure,

27

28 199 previous cardiac surgery, hypertension, dyspnoea, chronic obstructive pulmonary disease, renal

29

30 200 disease requiring dialysis, stroke, diabetes, chronic corticosteroid use, bleeding disorders) (29).

31

32 201 Higher rates of surgical site infection after TJA are shown in patients with hypoalbuminemia (30).

33

34 202 It has been described that RA is a risk factor for developing PJI after TJA. A systematic review

35

36 203 presented a significant odds ratio (OR) for PJI in RA patients with a THA of 1.75 (95% CI: 1.49 –

37

38 204 2.06) (12) and an OR of 1.34 (95% CI: 1.18 – 1.52) in patients with a TKA. We found that RA had a

39

40 205 significant crude RR for developing SSSI after primary TJA. The risk was 1.7 times higher for

41

42 206 patients with RA than those without RA when adjusting for all covariates, although this risk

43

44 207 difference was not statistically significant (Table 3). The significance of the association between RA

45

46 208 and SSSI may have gone undetected in this analysis because of the small number of infections and

47

48 209 type II statistical error.

49

50  
51 210

52

53 211 *Patient-related risk factors for the development of deep surgical site infection*

54

55

56

57

58

59

60



1  
2 212 We found that superficial wound complications were associated with developing PJI in 29% of our  
3  
4  
5 213 patients, with high ASA classification (3.3 times higher than patients with ASA <3) a determining  
6  
7 214 factor in the progression from SSSI to PJI. ASA classification is a crude estimate of a patient's medical  
8  
9 215 condition and a high score has been associated with the risk of PJI in numerous reports (11, 12). For  
10  
11 216 instance, Blanco et al. reported a 15-fold OR (95% CI: 6.54–35.80) for PJI in patients with ASA  
12  
13  
14 217 classification  $\geq 3$  and Panula et al. presented an HR of 3.2 (95% CI: 2.0–5.1) for the same ASA  
15  
16 218 classification (31).

17  
18 219 A recent meta-analysis showed that male sex was a risk factor for PJI development, especially after  
19  
20  
21 220 TKA (19). In our analysis male sex was close to a significant risk factor for progression from SSSI  
22  
23 221 into PJI, both as a single variable and after adjustment for all covariates (2.8 times higher risk for  
24  
25 222 men than women). The link between male sex and PJI may be attributed to certain contributing  
26  
27  
28 223 behavioural factors, including smoking, diet, hygiene and alcohol consumption, but the underlying  
29  
30 224 reasons for this are unclear. Sex-related differences in immune response due to bacteria (e.g.,  
31  
32 225 *Staphylococcus aureus* and *Pseudomonas aeruginosa*) have been reported. In addition, septicaemia  
33  
34 226 and bacteraemia occur more frequently in males than females (32), but whether they will affect the  
35  
36  
37 227 development of SSSI or PJI has yet to be determined. The absence of statistical significance for male  
38  
39 228 sex as a risk factor of developing PJI after SSSI can depend on the total number of infected patients  
40  
41  
42 229 in our study.

### 43 44 230 *Prevention of postoperative infection*

45  
46 231 The rate of SSSI (7%) and PJI (2%) in this study is consistent with international studies showing  
47  
48 232 levels of SSSI ranging from 1-10% (1, 33) and PJI ranging from 0.2-2.23% (5, 6, 8). The present  
49  
50  
51 233 work is focused on patient-related factors with a possible effect on the occurrence of SSSI or PJI after  
52  
53 234 elective primary TJA. Several other factors related to the surgery (e.g., operation time, intraoperative  
54  
55 235 blood loss, number of door openings, discipline in the operating room, antibiotic-prophylaxis used,  
56  
57  
58 236 surgeon's experience) may affect the risk of postoperative infection. However, those factors are not  
59  
60 237 included in our analysis. With the challenging complexity of PJI and its heavy burden on patients

1  
2 238 (34) and healthcare systems (35), prevention through effective strategies is the first and best approach  
3  
4  
5 239 and should be prioritized. Identifying high-risk patients planning to undergo arthroplasty surgery and  
6  
7 240 providing interventions when possible by modifying these risk factors might form the basis of PJI  
8  
9 241 prevention strategies in the future.

### 11 242 *Strengths*

13  
14 243 Two major strengths of this study are the large sample size (n=1,191) and the meticulous follow-up  
15  
16 244 of each patient. This thorough postoperative follow-up confirms that the number of recorded incidents  
17  
18 245 of SSSI is accurate, and the follow-up time of 5 (mean 7.3; range 5.1-9.2) years is sufficient to reveal  
19  
20  
21 246 potential cases of PJI. Similar studies have presented larger cohorts but only on registers (36, 37) or  
22  
23 247 shorter follow-ups (1, 2, 36).

25 248 Additionally, our study includes patients with primary elective joint surgery to minimise the influence  
26  
27  
28 249 of other risk factors connected to the initial trauma (hip fractures) or extended impact on the tissue  
29  
30 250 (revision surgery). This inclusion criterion is an additional strength of the study given that the rate of  
31  
32 251 PJI is known to be higher after trauma and revision surgery (38). According to preoperative screening  
33  
34  
35 252 routines in our hospital, patients with a history of excessive alcohol use, intravenous drug use, poor  
36  
37 253 oral hygiene or other medical conditions or medications that compromise immunity are excluded  
38  
39 254 from surgery or rehabilitated before surgery.

### 41 255 *Limitations*

43  
44 256 A potential limitation is the retrospective nature of our study design. Therefore, there may be  
45  
46 257 inaccuracies or misinterpretations of information retrieved from medical records. All our patients,  
47  
48 258 however, were interviewed in person to answer questions about the postoperative period. Thus, the  
49  
50  
51 259 information from medical reports was verified.

52  
53 260 Another limitation is that SSSI is not culture-verified but determined by a consultant orthopaedic  
54  
55 261 surgeon that reflects the clinical reality. Cultures of a superficial infection can be misleading, which  
56  
57  
58 262 can be classified as contamination, even if a possibility of a clinical significance of skin flora found  
59  
60 263 in cultures has recently been reported (39).

1  
2  
3  
4  
5  
6  
7  
8  
9  
10  
11  
12  
13  
14  
15  
16  
17  
18  
19  
20  
21  
22  
23  
24  
25  
26  
27  
28  
29  
30  
31  
32  
33  
34  
35  
36  
37  
38  
39  
40  
41  
42  
43  
44  
45  
46  
47  
48  
49  
50  
51  
52  
53  
54  
55  
56  
57  
58  
59  
60

264 As in infection-related research in general, where a small number of infections are a major challenge,  
265 this study may have failed to detect an association between a potential risk factor and postoperative  
266 infection due to a type II error.

## 267 **Conclusion**

268 In conclusion, this study demonstrates that older obese patients with a high ASA classification may  
269 have an increased risk of developing SSSI. Patients developing SSSI after primary elective hip or  
270 knee arthroplasty have a high risk of progressing into PJI and a high ASA classification significantly  
271 affects the progression from SSSI to PJI.

1  
2  
3 288 **Acknowledgments**

4  
5 289 We thank Jakob Viklander for his valuable assistance during the data compilation.

6  
7 290 **Ethics approval**

8  
9  
10 291 The study design was reviewed and approved by the Human Research Ethics Committee in  
11  
12 292 Uppsala, Sweden, Nr: 2019-01425.

13  
14 293 **Data availability statement**

15  
16  
17 294 The dataset generated and analysed during the current study is available from the corresponding  
18  
19 295 author on reasonable request.

20  
21  
22 296 **Competing interests**

23  
24  
25 297 The authors declare that they have no competing interests in this work.

26  
27  
28 298 **Funding**

29  
30 299 This research received no specific grant from any funding agency in public, commercial or not-for-  
31  
32 300 profit sectors.

33  
34  
35 301 **Contributors**

36  
37 302 Both authors (HE, SL) contributed substantially to the conception and design of the study  
38  
39  
40 303 and acquisition, analysis and interpretation of data. Both authors (HE, SL) have been  
41  
42 304 involved in drafting the manuscript and given final approval of the version to be published.

43  
44  
45 305 Both authors (HE, SL) have participated sufficiently in the work to take public responsibility  
46  
47 306 for appropriate portions of the content and agreed to be accountable for all aspects of the work  
48  
49 307 in ensuring that questions related to the accuracy or integrity of any part of the work are  
50  
51 308 appropriately investigated and resolved.

52  
53  
54 309 **Abbreviations**

55  
56 310 Superficial surgical site infection: SSSI; Periprosthetic joint infection: PJI; Total joint arthroplasty:  
57  
58  
59 311 TJA; Total hip arthroplasty: THA; Total knee arthroplasty: TKA; Body mass index: BMI; American  
60

1  
2 312 Society of Anesthesiologists classification: ASA classification; Rheumatologic disease: RA; Diabetes  
3  
4  
5 313 mellitus: DM; Risk ratios RR; Adjusted RR: aRR.  
6

7 314

8  
9 315

10  
11  
12  
13  
14  
15  
16  
17  
18  
19  
20  
21  
22  
23  
24  
25  
26  
27  
28  
29  
30  
31  
32  
33  
34  
35  
36  
37  
38  
39  
40  
41  
42  
43  
44  
45  
46  
47  
48  
49  
50  
51  
52  
53  
54  
55  
56  
57  
58  
59  
60

For peer review only

1  
2  
3  
4  
5  
6  
7  
8  
9  
10  
11  
12  
13  
14  
15  
16  
17  
18  
19  
20  
21  
22  
23  
24  
25  
26  
27  
28  
29  
30  
31  
32  
33  
34  
35  
36  
37  
38  
39  
40  
41  
42  
43  
44  
45  
46  
47  
48  
49  
50  
51  
52  
53  
54  
55  
56  
57  
58  
59  
60**References**

1. Carroll K, Dowsey M, Choong P, Peel T. Risk factors for superficial wound complications in hip and knee arthroplasty. *Clin Microbiol Infect*. 2014;20(2):130-5.
2. Peersman G, Laskin R, Davis J, Peterson M. Infection in total knee replacement: a retrospective review of 6489 total knee replacements. *Clin Orthop Relat Res*. 2001(392):15-23.
3. Saleh K, Olson M, Resig S, Bershadsky B, Kuskowski M, Gioe T, et al. Predictors of wound infection in hip and knee joint replacement: results from a 20 year surveillance program. *J Orthop Res*. 2002;20(3):506-15.
4. Lima AL, Oliveira PR, Carvalho VC, Saconi ES, Cabrita HB, Rodrigues MB. Periprosthetic Joint Infections. *Interdiscip Perspect Infect Dis*. 2013;2013:542796.
5. Urquhart DM, Hanna FS, Brennan SL, Wluka AE, Leder K, Cameron PA, et al. Incidence and risk factors for deep surgical site infection after primary total hip arthroplasty: a systematic review. *J Arthroplasty*. 2010;25(8):1216-22.e1-3.
6. Ridgeway S, Wilson J, Charlet A, Kafatos G, Pearson A, Coello R. Infection of the surgical site after arthroplasty of the hip. *J Bone Joint Surg Br*. 2005;87(6):844-50.
7. Cooper K, Lamagni T, Harrington P, Wloch C, Hopkins S. Surveillance of surgical site infections in NHS hospitals in England, April 2018 to March 2019. [Available from: [www.gov.uk/phe](http://www.gov.uk/phe).]
8. Phillips JE, Crane TP, Noy M, Elliott TS, Grimer RJ. The incidence of deep prosthetic infections in a specialist orthopaedic hospital: a 15-year prospective survey. *J Bone Joint Surg Br*. 2006;88(7):943-8.
9. Pulido L, Ghanem E, Joshi A, Purtill JJ, Parvizi J. Periprosthetic joint infection: the incidence, timing, and predisposing factors. *Clin Orthop Relat Res*. 2008;466(7):1710-5.
10. Jämsen E, Varonen M, Huhtala H, Lehto MU, Lumio J, Konttinen YT, et al. Incidence of prosthetic joint infections after primary knee arthroplasty. *J Arthroplasty*. 2010;25(1):87-92.

1

2

3

4

5

6

7

8

9

10

11

12

13

14

15

16

17

18

19

20

21

22

23

24

25

26

27

28

29

30

31

32

33

34

35

36

37

38

39

40

41

42

43

44

45

46

47

48

49

50

51

52

53

54

55

56

57

58

59

60

- 341 11. Dale H, Fenstad AM, Hallan G, Havelin LI, Furnes O, Overgaard S, et al. Increasing risk of  
342 prosthetic joint infection after total hip arthroplasty. *Acta Orthop*. 2012;83(5):449-58.
- 343 12. Kong L, Cao J, Zhang Y, Ding W, Shen Y. Risk factors for periprosthetic joint infection  
344 following primary total hip or knee arthroplasty: a meta-analysis. *Int Wound J*. 2017;14(3):529-36.
- 345 13. Kunutsor SK, Whitehouse MR, Blom AW, Beswick AD, Team I. Patient-Related Risk  
346 Factors for Periprosthetic Joint Infection after Total Joint Arthroplasty: A Systematic Review and  
347 Meta-Analysis. *PLoS One*. 2016;11(3):e0150866.
- 348 14. Maoz G, Phillips M, Bosco J, Slover J, Stachel A, Inneh I, et al. The Otto Aufranc Award:  
349 Modifiable versus nonmodifiable risk factors for infection after hip arthroplasty.  
350 *Clin Orthop Relat Res*. 2015;473(2):453-9.
- 351 15. Everhart JS, Altneu E, Calhoun JH. Medical comorbidities are independent preoperative risk  
352 factors for surgical infection after total joint arthroplasty.  
353 *Clin Orthop Relat Res*. 2013;471(10):3112-9.
- 354 16. Schrama JC, Espehaug B, Hallan G, Engesaeter LB, Furnes O, Havelin LI, et al. Risk of  
355 revision for infection in primary total hip and knee arthroplasty in patients with rheumatoid arthritis  
356 compared with osteoarthritis: a prospective, population-based study on 108,786 hip and knee joint  
357 arthroplasties from the Norwegian Arthroplasty Register.  
358 *Arthritis Care Res (Hoboken)*. 2010;62(4):473-9.
- 359 17. Swedish Association of Local Authorities and Regions. 2020 [cited 15 May 2020]  
360 [Available from: [www.skr.se](http://www.skr.se).]
- 361 18. Parvizi J, Tan TL, Goswami K, Higuera C, Della Valle C, Chen AF, et al. The 2018  
362 Definition of Periprosthetic Hip and Knee Infection: An Evidence-Based and Validated Criteria.  
363 *J Arthroplasty*. 2018;33(5):1309-14.e2.
- 364 19. Resende VAC, Neto AC, Nunes C, Andrade R, Espregueira-Mendes J, Lopes S. Higher age,  
365 female gender, osteoarthritis and blood transfusion protect against periprosthetic joint infection in  
366 total hip or knee arthroplasties: a systematic review and meta-analysis.

- 1  
2 367 Knee Surg Sports Traumatol Arthrosc. 2018.  
3  
4  
5 368 20. Shohat N, Fleischman A, Tarabichi M, Tan TL, Parvizi J. Weighing in on Body Mass Index  
6  
7 369 and Infection After Total Joint Arthroplasty: Is There Evidence for a Body Mass Index Threshold?  
8  
9 370 Clin Orthop Relat Res. 2018;476(10):1964-9.  
10  
11  
12 371 21. Sayed-Noor AS, Mukka S, Mohaddes M, Kärrholm J, Rolfson O. Body mass index is  
13  
14 372 associated with risk of reoperation and revision after primary total hip arthroplasty: a study of the  
15  
16 373 Swedish Hip Arthroplasty Register including 83,146 patients. Acta Orthop. 2019;90(3):220-5.  
17  
18  
19 374 22. Guh DP, Zhang W, Bansback N, Amarsi Z, Birmingham CL, Anis AH. The incidence of co-  
20  
21 375 morbidities related to obesity and overweight: a systematic review and meta-analysis.  
22  
23 376 BMC Public Health. 2009;9:88.  
24  
25  
26 377 23. Dowsey MM, Choong PF. Obesity is a major risk factor for prosthetic infection after  
27  
28 378 primary hip arthroplasty. Clin Orthop Relat Res. 2008;466(1):153-8.  
29  
30 379 24. Patel VP, Walsh M, Sehgal B, Preston C, DeWal H, Di Cesare PE. Factors associated with  
31  
32 380 prolonged wound drainage after primary total hip and knee arthroplasty.  
33  
34  
35 381 J Bone Joint Surg Am. 2007;89(1):33-8.  
36  
37 382 25. Cross MB, Yi PH, Thomas CF, Garcia J, Della Valle CJ. Evaluation of malnutrition in  
38  
39 383 orthopaedic surgery. J Am Acad Orthop Surg. 2014;22(3):193-9.  
40  
41  
42 384 26. Yayac M, Aggarwal R, Parvizi J. How viable is pre-surgery weight reduction for the  
43  
44 385 reduction of periprosthetic joint infection risk after total joint arthroplasty?  
45  
46 386 Expert Rev Med Devices. 2020;17(3):149-51.  
47  
48  
49 387 27. Nelson CL, Elkassabany NM, Kamath AF, Liu J. Low Albumin Levels, More Than Morbid  
50  
51 388 Obesity, Are Associated With Complications After TKA. Clin Orthop Relat Res.  
52  
53 389 2015;473(10):3163-72.  
54  
55  
56 390 28. Garcia GH, Fu MC, Dines DM, Craig EV, Gulotta LV. Malnutrition: a marker for increased  
57  
58 391 complications, mortality, and length of stay after total shoulder arthroplasty. J Shoulder Elbow  
59  
60 392 Surg. 2016;25(2):193-200.



- 1  
2 393 29. Fu MC, D'Ambrosia C, McLawhorn AS, Schairer WW, Padgett DE, Cross MB.  
3  
4  
5 394 Malnutrition Increases With Obesity and Is a Stronger Independent Risk Factor for Postoperative  
6  
7 395 Complications: A Propensity-Adjusted Analysis of Total Hip Arthroplasty Patients. *J Arthroplasty*.  
8  
9 396 2016;31(11):2415-21.  
10  
11 397 30. Bohl DD, Shen MR, Kayupov E, Della Valle CJ. Hypoalbuminemia Independently Predicts  
12  
13 Surgical Site Infection, Pneumonia, Length of Stay, and Readmission After Total Joint  
14 398 Arthroplasty. *J Arthroplasty*. 2016;31(1):15-21.  
15  
16 399  
17  
18 400 31. Panula VJ, Alakylä KJ, Venäläinen MS, Haapakoski JJ, Eskelinen AP, Manninen MJ, et al.  
19  
20 Risk factors for prosthetic joint infections following total hip arthroplasty based on 33,337 hips in  
21 401 the Finnish Arthroplasty Register from 2014 to 2018. *Acta Orthop*. 2021;92(6):665-72.  
22  
23 402  
24  
25 403 32. McClelland EE, Smith JM. Gender specific differences in the immune response to infection.  
26  
27 *Arch Immunol Ther Exp (Warsz)*. 2011;59(3):203-13.  
28 404  
29  
30 405 33. Guirro P, Hinarejos P, Pelfort X, Leal-Blanquet J, Torres-Claramunt R, Puig-Verdie L.  
31  
32 406 Long term follow-up of successfully treated superficial wound infections following TKA.  
33  
34 *J Arthroplasty*. 2015;30(1):101-3.  
35 407  
36  
37 408 34. Andersson AE, Bergh I, Karlsson J, Nilsson K. Patients' experiences of acquiring a deep  
38  
39 409 surgical site infection: an interview study. *Am J Infect Control*. 2010;38(9):711-7.  
40  
41 410 35. Kurtz SM, Lau EC, Ong KL, Adler EM, Kolisek FR, Manley MT. Which Clinical and  
42  
43 Patient Factors Influence the National Economic Burden of Hospital Readmissions After Total Joint  
44 411 Arthroplasty? *Clin Orthop Relat Res*. 2017.  
45  
46 412  
47  
48 413 36. Almustafa MA, Ewen AM, Deakin AH, Picard F, Clarke JV, Mahmood FF. Risk Factors for  
49  
50 Surgical Site Infection Following Lower Limb Arthroplasty: A Retrospective Cohort Analysis of  
51 414 3932 Lower Limb Arthroplasty Procedures in a High Volume Arthroplasty Unit.  
52  
53 415 *J Arthroplasty*. 2018;33(6):1861-7.  
54  
55 416  
56  
57 417 37. Jämsen E, Huhtala H, Puolakka T, Moilanen T. Risk factors for infection after knee  
58  
59 arthroplasty. A register-based analysis of 43,149 cases. *J Bone Joint Surg Am*. 2009;91(1):38-47.  
60 418

1

2

3

4

5

6

7

8

9

10

11

12

13

14

15

16

17

18

19

20

21

22

23

24

25

26

27

28

29

30

31

32

33

34

35

36

37

38

39

40

41

42

43

44

45

46

47

48

49

50

51

52

53

54

55

56

57

58

59

60

419 38. Kärrholm J, Rogmark C, Nauclér E, Vinblad J, Mohaddes M, Rolfson R. Swedish Hip  
Arthroplasty Register. Annual report 2018. [Available from: [www.shpr.se](http://www.shpr.se).]

421 39. Widerström M, Stegger M, Johansson A, Gurram BK, Larsen AR, Wallinder L, et al.  
422 Heterogeneity of Staphylococcus epidermidis in prosthetic joint infections: time to reevaluate  
423 microbiological criteria? Eur J Clin Microbiol Infect Dis. 2022;41(1):87-97.

424

425

426

427

428

429

430

431

432

433

434

435

436

437

438

439

440

441

442

443

444

445

446

447

448

449

450

451

452

453

454

455

456

457

458

459

460

461

462

463

464

465

466

467

468

469

470

## Figure legends

### Figure 1. Directed acyclic graph for the selection of confounders

The circle with an arrow indicates the exposure, the circles with an (I) illustrate outcomes and the circles without text indicate confounders used in the statistical model.

### Figure 2. Proportion of SSSI and PJI in the total cohort

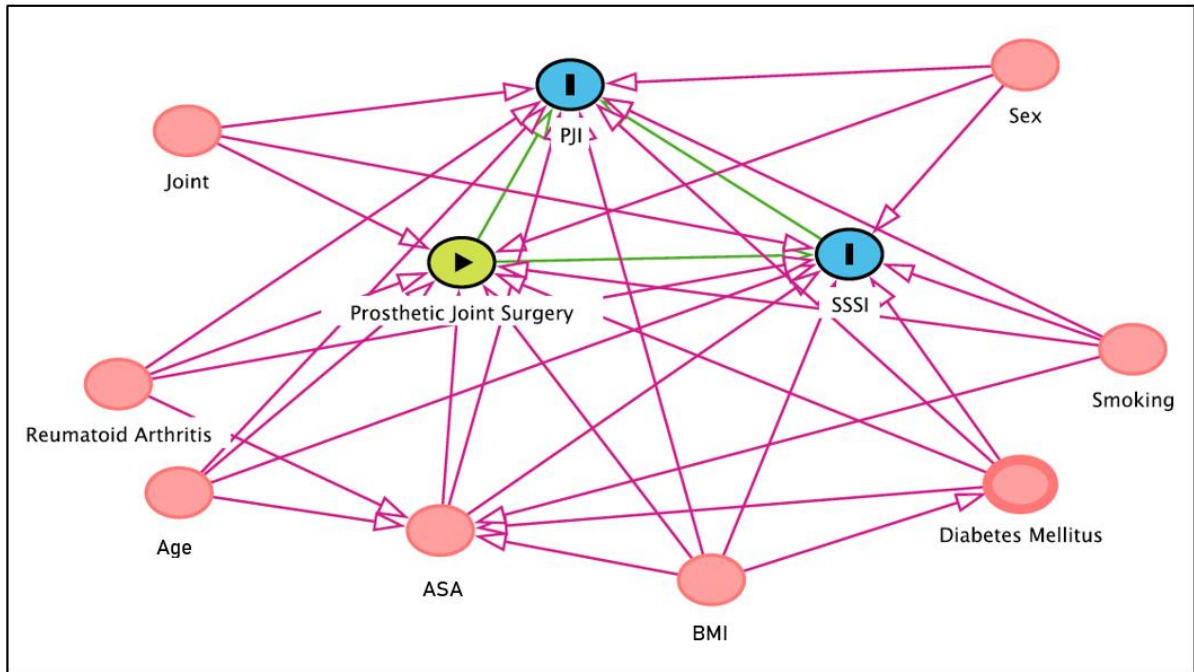

For review only

1  
2  
3  
4  
5  
6  
7  
8  
9  
10  
11  
12  
13  
14  
15  
16  
17  
18  
19  
20  
21  
22  
23  
24  
25  
26  
27  
28  
29  
30  
31  
32  
33  
34  
35  
36  
37  
38  
39  
40  
41  
42  
43  
44  
45  
46  
47  
48  
49  
50  
51  
52  
53  
54  
55  
56  
57  
58  
59  
60

1  
2  
3  
4  
5  
6  
7  
8  
9  
10  
11  
12  
13  
14  
15  
16  
17  
18  
19  
20  
21  
22  
23  
24  
25  
26  
27  
28  
29  
30  
31  
32  
33  
34  
35  
36  
37  
38  
39  
40  
41  
42  
43  
44  
45  
46  
47  
48  
49  
50  
51  
52  
53  
54  
55  
56  
57  
58  
59  
60

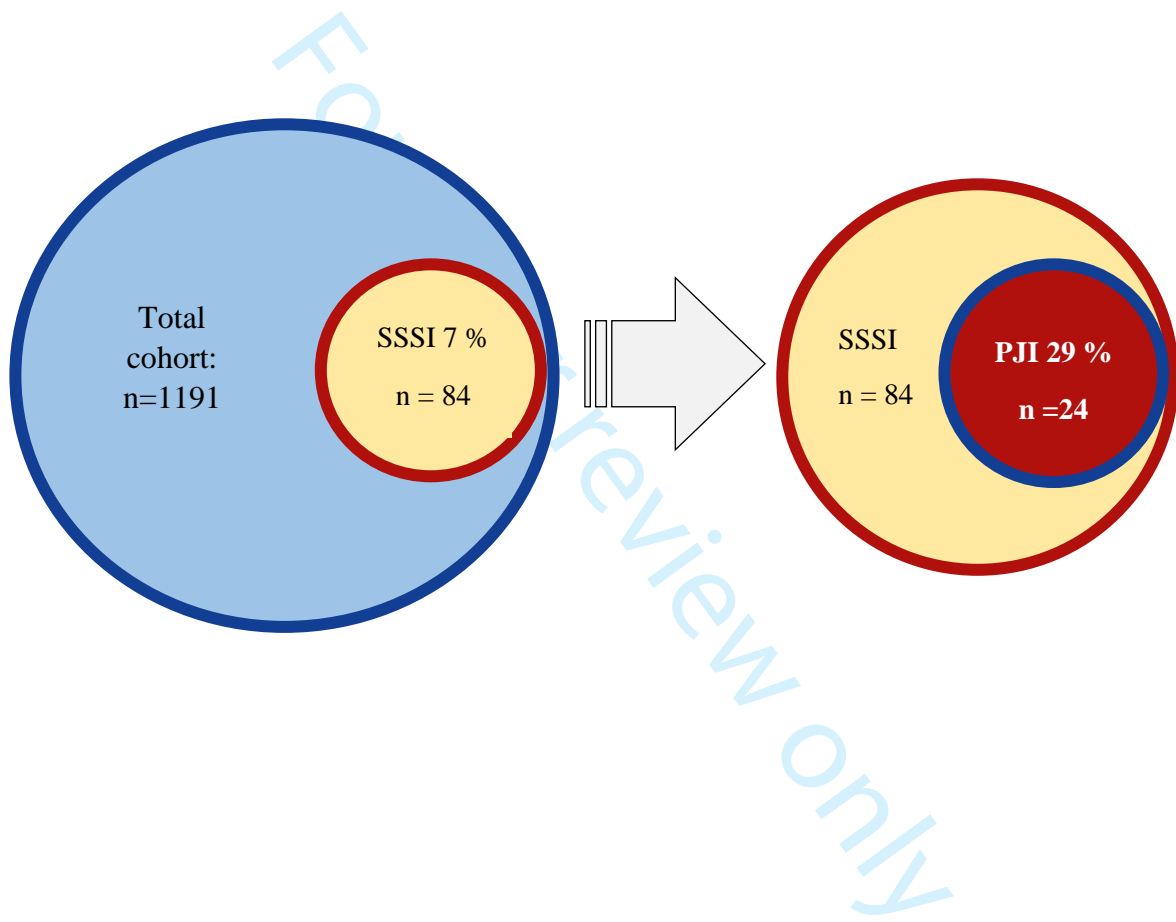

**Supplementary Table 1. Risk ratio (RR) for PJI**

|                                |                               |                |                                  |                |
|--------------------------------|-------------------------------|----------------|----------------------------------|----------------|
| <b>SSSI - no PJI</b>           | 1167 (98%)                    |                |                                  |                |
| <b>SSSI - PJI</b>              | 24 (2%)                       |                |                                  |                |
| <b>Variable</b>                | <b>Crude RR<br/>(95 % CI)</b> | <b>P-value</b> | <b>Adjusted RR<br/>(95 % CI)</b> | <b>P-value</b> |
| <b>Joint</b>                   |                               |                |                                  |                |
| <b>Hip</b>                     | ref                           |                | ref                              |                |
| <b>Knee</b>                    | 2.1 (0.9 – 4.7)               | 0.073          | 2.0 (0.8 – 4.8)                  | 0.112          |
| <b>Age</b>                     |                               |                |                                  |                |
| <b>&lt;65</b>                  | ref                           |                | ref                              |                |
| <b>≥65</b>                     | 1.3 (0.6 – 2.9)               | 0.517          | 1.1 (0.5 – 2.7)                  | 0.781          |
| <b>ASA-class<sup>a</sup></b>   |                               |                |                                  |                |
| <b>≤2</b>                      | ref                           |                | ref                              |                |
| <b>≥3</b>                      | 4.8 (2.1 – 10.9)              | <b>0.000</b>   | 3.8 (1.6 – 9.1)                  | <b>0.003</b>   |
| <b>BMI</b>                     |                               |                |                                  |                |
| <b>BMI&lt;25</b>               | ref                           |                | ref                              |                |
| <b>25≤BMI&lt;30</b>            | 2.0 (0.8 – 5.1)               | 0.142          | 1.9 (0.6 – 5.9)                  | 0.271          |
| <b>BMI≥30</b>                  | 1.9 (0.9 – 4.4)               | 0.110          | 1.2 (0.4 – 3.3)                  | 0.772          |
| <b>Sex</b>                     |                               |                |                                  |                |
| <b>Woman</b>                   | ref                           |                | ref                              |                |
| <b>Men</b>                     | 2.1 (0.9 – 4.9)               | 0.075          | 2.8 (1.2 – 6.9)                  | <b>0.022</b>   |
| <b>Smoking<sup>b</sup></b>     |                               |                |                                  |                |
| <b>No</b>                      | ref                           |                | ref                              |                |
| <b>Yes</b>                     | 2.7 (0.4 – 20.0)              | 0.338          | 2.5 (0.3 – 19.0)                 | 0.379          |
| <b>Diabetes</b>                |                               |                |                                  |                |
| <b>No</b>                      | ref                           |                | ref                              |                |
| <b>Yes</b>                     | 2.3 (0.9 – 6.3)               | 0.101          | 1.4 (0.5 – 4.1)                  | 0.543          |
| <b>Rheumatological disease</b> |                               |                |                                  |                |
| <b>No</b>                      | ref                           |                | ref                              |                |
| <b>Yes</b>                     | 2.0 (0.8 -5.5)                | 0.166          | 1.8 (0.6 – 5.2)                  | 0.294          |

ASA (American Society of Anaesthesiologists), BMI (Body mass index).

<sup>a</sup> missing data in 17 cases

<sup>b</sup> missing data in 5 cases

**STROBE 2007 (v4) Statement—Checklist of items that should be included in reports of *cross-sectional studies***

| Section/Topic                | Item # | Recommendation                                                                                                                                                                       | Reported on page # |
|------------------------------|--------|--------------------------------------------------------------------------------------------------------------------------------------------------------------------------------------|--------------------|
| <b>Title and abstract</b>    | 1      | (a) Indicate the study's design with a commonly used term in the title or the abstract                                                                                               | 1                  |
|                              |        | (b) Provide in the abstract an informative and balanced summary of what was done and what was found                                                                                  | 2                  |
| <b>Introduction</b>          |        |                                                                                                                                                                                      |                    |
| Background/rationale         | 2      | Explain the scientific background and rationale for the investigation being reported                                                                                                 | 3                  |
| Objectives                   | 3      | State specific objectives, including any prespecified hypotheses                                                                                                                     | 3                  |
| <b>Methods</b>               |        |                                                                                                                                                                                      |                    |
| Study design                 | 4      | Present key elements of study design early in the paper                                                                                                                              | 4                  |
| Setting                      | 5      | Describe the setting, locations, and relevant dates, including periods of recruitment, exposure, follow-up, and data collection                                                      | 4                  |
| Participants                 | 6      | (a) Give the eligibility criteria, and the sources and methods of selection of participants                                                                                          | 5                  |
| Variables                    | 7      | Clearly define all outcomes, exposures, predictors, potential confounders, and effect modifiers. Give diagnostic criteria, if applicable                                             | 5                  |
| Data sources/<br>measurement | 8*     | For each variable of interest, give sources of data and details of methods of assessment (measurement). Describe comparability of assessment methods if there is more than one group | 5                  |
| Bias                         | 9      | Describe any efforts to address potential sources of bias                                                                                                                            | na                 |
| Study size                   | 10     | Explain how the study size was arrived at                                                                                                                                            | 5                  |
| Quantitative variables       | 11     | Explain how quantitative variables were handled in the analyses. If applicable, describe which groupings were chosen and why                                                         | na                 |
| Statistical methods          | 12     | (a) Describe all statistical methods, including those used to control for confounding                                                                                                | 5                  |
|                              |        | (b) Describe any methods used to examine subgroups and interactions                                                                                                                  | 5                  |
|                              |        | (c) Explain how missing data were addressed                                                                                                                                          | 5                  |
|                              |        | (d) If applicable, describe analytical methods taking account of sampling strategy                                                                                                   | na                 |
|                              |        | (e) Describe any sensitivity analyses                                                                                                                                                | na                 |
| <b>Results</b>               |        |                                                                                                                                                                                      |                    |

|                          |     |                                                                                                                                                                                                                                                                                                                                                                                                               |              |
|--------------------------|-----|---------------------------------------------------------------------------------------------------------------------------------------------------------------------------------------------------------------------------------------------------------------------------------------------------------------------------------------------------------------------------------------------------------------|--------------|
| Participants             | 13* | (a) Report numbers of individuals at each stage of study—eg numbers potentially eligible, examined for eligibility, confirmed eligible, included in the study, completing follow-up, and analysed<br>(b) Give reasons for non-participation at each stage<br>(c) Consider use of a flow diagram                                                                                                               | 6            |
| Descriptive data         | 14* | (a) Give characteristics of study participants (eg demographic, clinical, social) and information on exposures and potential confounders<br>(b) Indicate number of participants with missing data for each variable of interest                                                                                                                                                                               | 6            |
| Outcome data             | 15* | Report numbers of outcome events or summary measures                                                                                                                                                                                                                                                                                                                                                          | 7            |
| Main results             | 16  | (a) Give unadjusted estimates and, if applicable, confounder-adjusted estimates and their precision (eg, 95% confidence interval). Make clear which confounders were adjusted for and why they were included<br>(b) Report category boundaries when continuous variables were categorized<br>(c) If relevant, consider translating estimates of relative risk into absolute risk for a meaningful time period | 8<br>5<br>na |
| Other analyses           | 17  | Report other analyses done—eg analyses of subgroups and interactions, and sensitivity analyses                                                                                                                                                                                                                                                                                                                | 10           |
| <b>Discussion</b>        |     |                                                                                                                                                                                                                                                                                                                                                                                                               |              |
| Key results              | 18  | Summarise key results with reference to study objectives                                                                                                                                                                                                                                                                                                                                                      | 11           |
| Limitations              | 19  | Discuss limitations of the study, taking into account sources of potential bias or imprecision. Discuss both direction and magnitude of any potential bias                                                                                                                                                                                                                                                    | 12           |
| Interpretation           | 20  | Give a cautious overall interpretation of results considering objectives, limitations, multiplicity of analyses, results from similar studies, and other relevant evidence                                                                                                                                                                                                                                    | 11           |
| Generalisability         | 21  | Discuss the generalisability (external validity) of the study results                                                                                                                                                                                                                                                                                                                                         | 12           |
| <b>Other information</b> |     |                                                                                                                                                                                                                                                                                                                                                                                                               |              |
| Funding                  | 22  | Give the source of funding and the role of the funders for the present study and, if applicable, for the original study on which the present article is based                                                                                                                                                                                                                                                 | 13           |

\*Give information separately for cases and controls in case-control studies and, if applicable, for exposed and unexposed groups in cohort and cross-sectional studies.

**Note:** An Explanation and Elaboration article discusses each checklist item and gives methodological background and published examples of transparent reporting. The STROBE checklist is best used in conjunction with this article (freely available on the Web sites of PLoS Medicine at <http://www.plosmedicine.org/>, Annals of Internal Medicine at <http://www.annals.org/>, and Epidemiology at <http://www.epidem.com/>). Information on the STROBE Initiative is available at [www.strobe-statement.org](http://www.strobe-statement.org).
