# Supplementary material for: Patient-related factors associated with superficial surgical site infection and progression to a periprosthetic joint infection after elective primary total joint arthroplasty: a single-centre, retrospective study in Sweden
Source: PubMed Central journal article supplement — BMJ Open. 2022 Sep 15;12(9):e060754. doi: 10.1136/bmjopen-2022-060754 (PMC9486361; doi:10.1136/bmjopen-2022-060754), 2022-09-15
Supplement: bmjopen-2022-060754supp001.pdf [file bmjopen-2022-060754supp001.pdf]

**Supplementary Table 1. Risk ratio (RR) for PJI**

| Variable                       | Crude RR<br>(95 % CI) | P-value      | Adjusted RR<br>(95 % CI) | P-value      |
|--------------------------------|-----------------------|--------------|--------------------------|--------------|
| <b>SSSI - no PJI</b>           | 1167 (98%)            |              |                          |              |
| <b>SSSI - PJI</b>              | 24 (2%)               |              |                          |              |
| <b>Joint</b>                   |                       |              |                          |              |
| Hip                            | ref                   |              | ref                      |              |
| Knee                           | 2.1 (0.9 – 4.7)       | 0.073        | 2.0 (0.8 – 4.8)          | 0.112        |
| <b>Age</b>                     |                       |              |                          |              |
| <65                            | ref                   |              | ref                      |              |
| ≥65                            | 1.3 (0.6 – 2.9)       | 0.517        | 1.1 (0.5 – 2.7)          | 0.781        |
| <b>ASA-class<sup>a</sup></b>   |                       |              |                          |              |
| ≤2                             | ref                   |              | ref                      |              |
| ≥3                             | 4.8 (2.1 – 10.9)      | <b>0.000</b> | 3.8 (1.6 – 9.1)          | <b>0.003</b> |
| <b>BMI</b>                     |                       |              |                          |              |
| BMI<25                         | ref                   |              | ref                      |              |
| 25≤BMI<30                      | 2.0 (0.8 – 5.1)       | 0.142        | 1.9 (0.6 – 5.9)          | 0.271        |
| BMI≥30                         | 1.9 (0.9 – 4.4)       | 0.110        | 1.2 (0.4 – 3.3)          | 0.772        |
| <b>Sex</b>                     |                       |              |                          |              |
| Woman                          | ref                   |              | ref                      |              |
| Men                            | 2.1 (0.9 – 4.9)       | 0.075        | 2.8 (1.2 – 6.9)          | <b>0.022</b> |
| <b>Smoking<sup>b</sup></b>     |                       |              |                          |              |
| No                             | ref                   |              | ref                      |              |
| Yes                            | 2.7 (0.4 – 20.0)      | 0.338        | 2.5 (0.3 – 19.0)         | 0.379        |
| <b>Diabetes</b>                |                       |              |                          |              |
| No                             | ref                   |              | ref                      |              |
| Yes                            | 2.3 (0.9 – 6.3)       | 0.101        | 1.4 (0.5 – 4.1)          | 0.543        |
| <b>Rheumatological disease</b> |                       |              |                          |              |
| No                             | ref                   |              | ref                      |              |
| Yes                            | 2.0 (0.8 -5.5)        | 0.166        | 1.8 (0.6 – 5.2)          | 0.294        |

ASA (American Society of Anaesthesiologists), BMI (Body mass index).

<sup>a</sup> missing data in 17 cases<sup>b</sup> missing data in 5 cases
